# 1      **Strategy and performance evaluation of low-frequency variant** 2      **calling for SARS-CoV-2 in wastewater using targeted deep Illumina** 3      **sequencing**

4      Laura A. E. Van Poelvoorde <sup>a,c,d,¶</sup>, Thomas Delcourt <sup>a,¶</sup>, Wim Coucke <sup>b</sup>, Philippe Herman <sup>e</sup>,  
5      Sigrid C. J. De Keersmaecker <sup>a</sup>, Xavier Saelens <sup>c,d</sup>, Nancy Roosens <sup>a,§</sup>, Kevin Vanneste <sup>a,§</sup>

6      ¶ Equal first-author contribution

7      § Equal last-author contribution

8

9      <sup>a</sup> Transversal activities in Applied Genomics, Sciensano, Brussels, Belgium

10      <sup>b</sup> Quality of laboratories, Sciensano, Brussels, Belgium

11      <sup>c</sup> Department of Biochemistry and Microbiology, Ghent University, Ghent, Belgium

12      <sup>d</sup> VIB-UGent Center for Medical Biotechnology, VIB, Ghent, Belgium

13      <sup>e</sup> Expertise and Service Provision, Sciensano, Brussels, Belgium

14

15      \* Corresponding author during submission process:

16      Laura Van Poelvoorde ([laura.vanpoelvoorde@sciensano.be](mailto:laura.vanpoelvoorde@sciensano.be))

17      \* Corresponding author post-publication:

18      Kevin Vanneste ([kevin.vanneste@sciensano.be](mailto:kevin.vanneste@sciensano.be))

19

## 20      **Keywords**

21      Wastewater surveillance; SARS-CoV-2; Illumina; NGS; Variant of concern

## 22 Abstract

23 The ongoing COVID-19 pandemic, caused by SARS-CoV-2, constitutes a tremendous global  
 24 health issue. Continuous monitoring of the virus has become a cornerstone to make rational  
 25 decisions on implementing societal and sanitary measures to curtail the virus spread.  
 26 Additionally, emerging SARS-CoV-2 variants have increased the need for genomic  
 27 surveillance to detect particular strains because of their potentially increased transmissibility,  
 28 pathogenicity and immune escape. Targeted SARS-CoV-2 sequencing of wastewater has  
 29 been explored as an epidemiological surveillance method for the competent authorities. Few  
 30 quality criteria are however available when sequencing wastewater samples, and those  
 31 available typically only pertain to constructing the consensus genome sequence. Multiple  
 32 variants circulating in the population can however be simultaneously present in wastewater  
 33 samples. The performance, including detection and quantification of low-abundant variants,  
 34 of whole genome sequencing (WGS) of SARS-CoV-2 in wastewater samples remains  
 35 largely unknown. Here, we evaluated the detection and quantification of mutations present at  
 36 low abundances using the SARS-CoV-2 lineage B.1.1.7 (alpha variant) defining mutations  
 37 as a case study. Real sequencing data were *in silico* modified by introducing mutations of  
 38 interest into raw wild-type sequencing data, or by mixing wild-type and mutant raw  
 39 sequencing data, to mimic wastewater samples subjected to WGS using a tiling amplicon-  
 40 based targeted metagenomics approach and Illumina sequencing. As anticipated, higher  
 41 variation, lower sensitivity and more false negatives, were observed at lower coverages and  
 42 allelic frequencies. We found that detection of all low-frequency variants at an abundance of  
 43 10%, 5%, 3% and 1%, requires at least a sequencing coverage of 250X, 500X, 1500X and  
 44 10,000X, respectively. Although increasing variability of estimated allelic frequencies at  
 45 decreasing coverages and lower allelic frequencies was observed, its impact on reliable  
 46 quantification was limited. This study provides a highly sensitive low-frequency variant  
 47 detection approach, which is publicly available at <https://galaxy.sciensano.be>, and specific  
 48 recommendations for minimum sequencing coverages to detect clade-defining mutations at  
 49 specific allelic frequencies.

# 1 Introduction

Severe acute respiratory syndrome coronavirus 2 (SARS-CoV-2) is the causative agent of the ongoing COVID-19 pandemic [1]. To limit the spread of disease, governments were forced to take drastic measures due to the high potential for human-to-human transmission and the lack of immunity in the population [2]. SARS-CoV-2 spreads very easily during close person-to-person contact [3]. Consequently, the individual diagnostic testing for SARS-CoV-2 on respiratory samples using reverse transcription quantitative polymerase chain reaction (RT-qPCR) is essential for the diagnosis of patients presenting COVID-19 symptoms for appropriate clinical treatment and isolation, as well as for tracing potential contact transmissions, including asymptomatic individuals. Systematic individual SARS-CoV-2 diagnostics are also used to test certain population cohorts, such as primary caregivers, to avoid transmission of the virus to vulnerable people, such as the elderly.

Data from individual diagnostics are also collected and analysed for surveillance by National Reference Centres to assist governments to monitor the epidemiological situation. The efficiency of this strategy for epidemiological monitoring depends greatly on the extent of testing the complete population. Additionally, it may be biased by the willingness of individuals, covering all population ages, to get tested, whether individuals are aware of being infected, and visitors to a certain country not always being included in the testing strategy. Moreover, despite having a relatively low per-sample cost, the high volume of required tests incurs substantial costs for public health systems for which testing capacities can be exceeded during periods of intense circulation of the virus [4]. The detection of newly emerging SARS-CoV-2 strains may be delayed by the lack of testing during such periods. As SARS-CoV-2 viral particles and mRNA have been isolated from faeces of COVID-19 patients [5, 6], monitoring of wastewater for SARS-CoV-2 has been explored as a complementary and independent alternative for epidemiological surveillance for the competent authorities [7]. Various studies have observed an association between an increase in reported COVID-19 cases and an increase of SARS-CoV-2 RNA concentrations

77 in wastewater [8–10]. Wastewater-based monitoring could therefore be a cost-effective, non-  
 78 invasive, easy to collect, and unbiased approach to track circulating virus strains in a  
 79 community [11]. Compared to clinical surveillance, wastewater surveillance could also  
 80 provide opportunities to estimate the prevalence of the virus and assess its geographic  
 81 distribution and genetic diversity [12, 13], and can be used as a non-invasive early-warning  
 82 system for alerting public health authorities to the potential (re-)emergence of COVID-19  
 83 infections [14]. Alternatively, the absence of the virus in wastewater surveillance could  
 84 indicate that an area can be considered at low risk for SARS-CoV-2 infections [7].

85 Although the mutation rate of SARS-CoV-2 is estimated as being low compared to other  
 86 RNA viruses [15], several new variants carrying multiple mutations have already emerged.  
 87 Some of these variants are characterized by a potential enhanced transmissibility, and can  
 88 cause more severe infections and/or potential vaccine escape [16–20]. Consequently,  
 89 monitoring current and potential future variants, is crucial to control the epidemic by taking  
 90 timely measures because these variants can affect epidemiological dynamics, vaccine  
 91 effectiveness and disease burden.

92 To monitor SARS-CoV-2 variants, RT-qPCR methods were designed to detect a selection of  
 93 the mutations that define specific variants of concern (VOCs). VOCs are however defined by  
 94 a combination of multiple mutations and only few mutations can be targeted by RT-qPCR  
 95 assays, but many VOCs are characterized by a high number of specific mutations. This  
 96 approach is also not sustainable because it is likely that the ongoing vaccination and  
 97 increased herd immunity will result in the selection of new mutations and emergence of new  
 98 VOCs [21], as has been observed with other viruses [22, 23]. Since only a few mutations can  
 99 be targeted by a RT-qPCR assay, an additional step of whole genome sequencing (WGS) is  
 100 required to fully confirm the variant's sequence [24].

101 WGS has been used to understand the viral evolution, epidemiology and impact of SARS-  
 102 CoV-2 resulting in, as of July 2021, more than 2,000,000 publically available SARS-CoV-2  
 103 genome sequences, mainly derived from respiratory samples that are frequently submitted

to the Global Initiative on Sharing Avian Influenza Data (GISAID) database [25]. Most of these sequences were obtained using amplicon sequencing in combination with the Illumina or Nanopore technology, with Illumina still being the most commonly used method [25, 26]. This large amount of genomes allows reliable detection of variants based on the consensus genome sequence in patient samples [27–30]. The European Centre for Disease Prevention and Control (ECDC) has defined several quality criteria for clinical samples depending on the application. For most genomic surveillance objectives, a consensus sequence of the (near-)complete genome is sufficient and a minimal read length of 100 bp and minimal coverage of 10X across more than 95% of the genome is recommended. To reliably trace direct transmission and/or reinfection, a higher sequencing coverage of 500X across more than 95% of the genome is recommended for determining low-frequency variants (LFV) that can significantly contribute to the evidence for reinfection or direct transmission. In-depth genome analysis, including recombination, rearrangement, haplotype reconstruction and large insertions and deletions (indel) detection, should be investigated using long-read sequencing technologies with a recommended read length of minimally 1000 bp and a sequencing coverage of 500X across more than 95% of the genome [31]. Due to the high cost of sequencing large quantities of samples from individual patient, samples that tested positive for a selection of mutations related to VOCs using RT-qPCR and have a sufficiently high viral load are typically sequenced. Consequently, only a subset of all circulating variants is detected during routine clinical surveillance. Since wastewater samples contain both SARS-CoV-2 RNA from symptomatic and asymptomatic individuals, sequencing wastewater samples can provide a more comprehensive picture of the genomic diversity of SARS-CoV-2 circulating in the population compared to individual clinical testing and sequencing. Wastewater surveillance of SARS-CoV-2 may therefore be of considerable added value for SARS-CoV-2 genomic surveillance by providing a cost-effective, rapid and reliable source of information on the spread of SARS-CoV-2 variants in the population.

Sequencing of wastewater samples is however currently mainly used to reconstruct the consensus genome sequence of the most prevalent SARS-CoV-2 strain in the sample and

LFV are often not investigated. This consensus sequence can be useful to demonstrate that the detected strain in wastewater corresponds to the dominant strain that circulates in individuals within the same community [32]. However, in contrast to clinical samples, only limited quality criteria are in place when sequencing wastewater samples and those available often only apply for consensus sequence construction. The EU recommends the generation of one million reads per sample and a read length of more than 100 bp [7]. A few studies evaluated LFV in wastewater samples, by using local haplotype reconstruction with ShoRAH [33] or iVar using a minimum coverage of 50X, Phred score of  $\geq 30$  and a minimal allelic frequency (AF) of 10% [34]. However, none of these studies evaluated their approach on well-defined populations nor determined detection thresholds for retaining LFV. Since multiple VOCs may co-circulate in a given population, their relative abundance is expected to vary and potentially be very low in wastewater samples. While genome consensus variant calling workflows can only identify mutations present at high AFs, LFV calling methods have been specifically designed to call mutations at lower-than-consensus AFs, and are required to detect VOCs in wastewater samples that are present at an AF below 50%. Appropriate tools and statistical approaches should be provided to ensure reliable and comparable collection and analysis of data, because the detection of LFV is challenging due to the drop in confidence of called mutations at low AFs and sequencing coverages [35–37]. High-quality sequencing reads are required to ensure that single nucleotide variants (SNVs) and indels can be reliably called and quantified. Most LFV calling algorithms therefore consider multiple sequencing characteristics such as strand bias, base quality, mapping quality, sequence context and AF [38] to delineate true variants from sequencing errors. Although the viral diversity in multiple WGS-based studies has been explored using several variant calling methods [39–41], they are often not benchmarked against defined viral populations, rendering the feasibility of using these methods for detecting SARS-CoV-2 VOCs in mixed samples for wastewater surveillance largely unknown.

In this study, we evaluate the performance of LFV detection based on targeted SARS-CoV-2 sequencing to detect and quantify mutations present at low abundances. This approach

mimics wastewater deep sequencing by means of the Illumina technology. We used mutations that define the B.1.1.7 lineage as a proof-of-concept. Using two real sequencing datasets that were *in silico* modified by either introducing mutations of interest into raw wild-type sequencing datasets or mixing wild-type and mutant raw sequencing data, we provide guidelines for minimum sequencing coverages to detect clade-defining mutations at specific AFs.

## 2 Methods

### 2.1 Employed sequencing data and generation of consensus genome sequences

SARS-CoV-2 raw sequencing data from 316 samples was downloaded from the Sequence Read Archive (SRA) [42]. A random selection of samples was done on the 27<sup>th</sup> of January 2021 from the COVID-19 Genomics UK (COG-UK) consortium (PRJEB37886) including only samples with a submission date in January 2021, sequenced with Illumina Novaseq 6000 and using an amplicon-based enrichment strategy (Supplementary File S1).

174

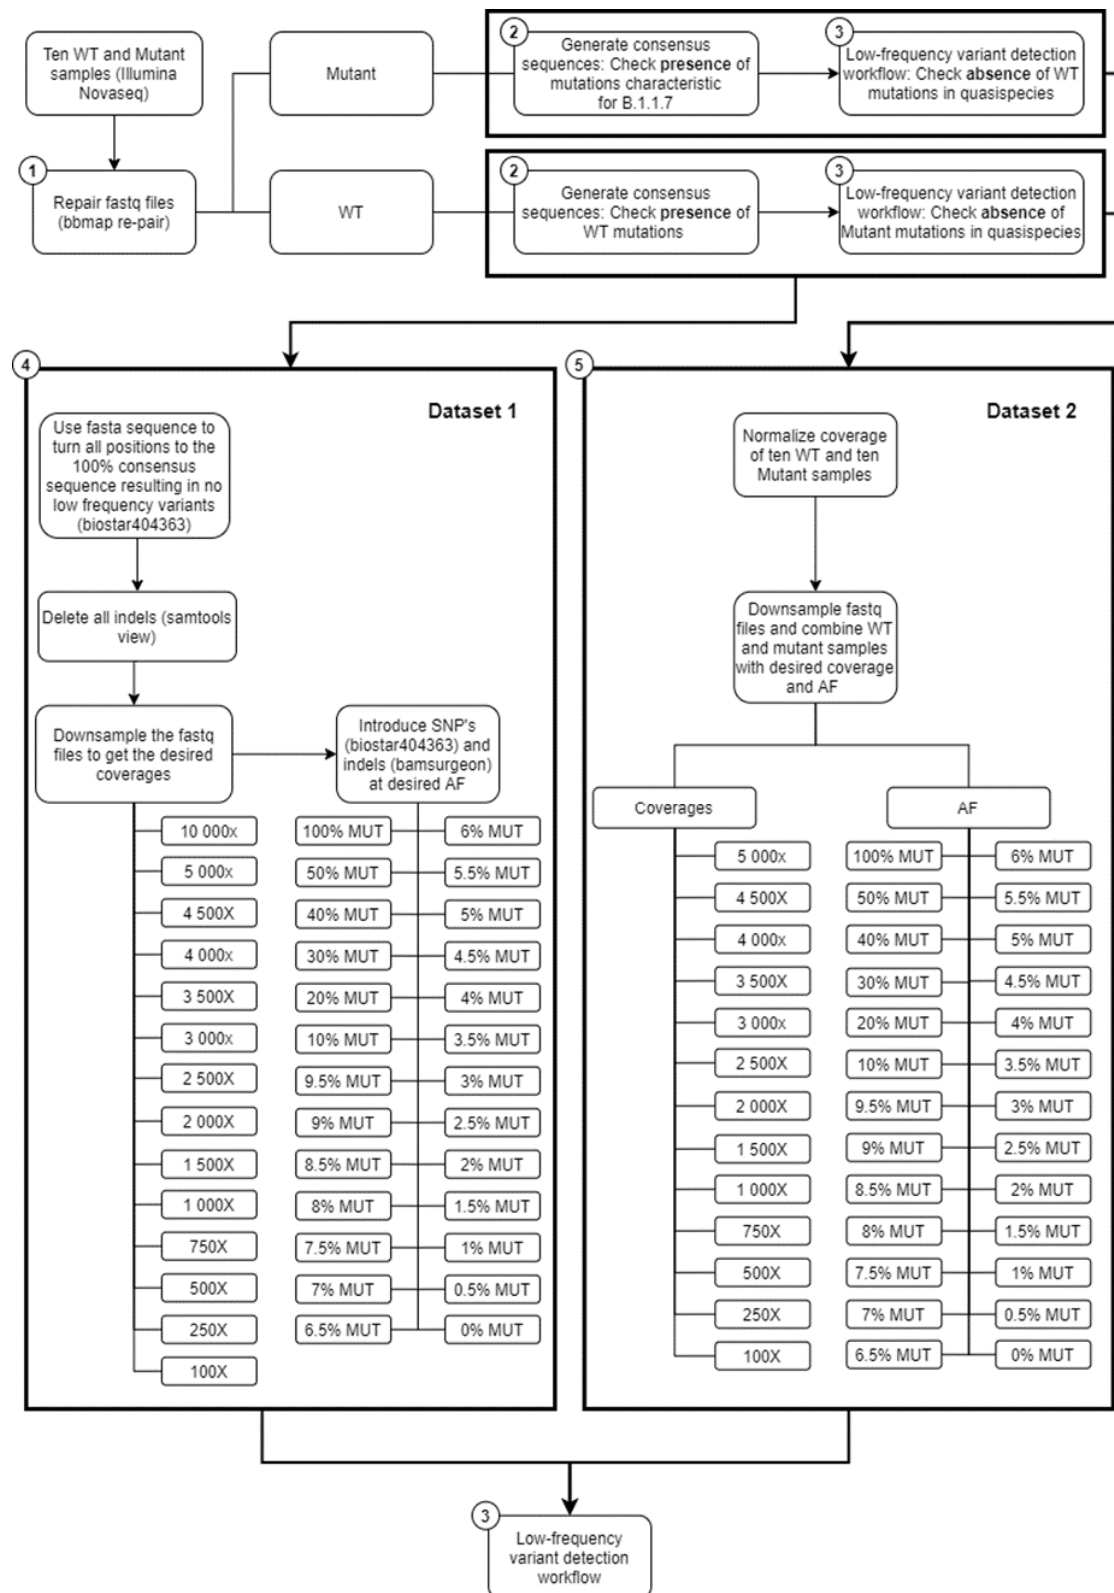

175

176 **Figure 1: Schematic representation of the workflow.**



177 To ensure correct pairing of fastq files, all samples were re-paired using BBMap v38.89  
178 repair.sh with default settings [43] (Figure 1: Step 1). The consensus genome sequences  
179 were generated for all these samples (Figure 1: Step 2). The workflow was built using the  
180 Snakemake workflow management system using python 3.6.9 [44]. Next, the re-paired  
181 paired-end reads were trimmed using Trimmomatic v0.38 [45] setting the following options:  
182 'LEADING:10', 'TRAILING:10' 'SLIDINGWINDOW:4:20', and 'MINLEN:40'. As reference  
183 genome, the sequence with GISAID [25] accession number EPI\_ISL\_837246 was used for  
184 the wild-type samples, while EPI\_ISL\_747518 was used for the mutant samples. These  
185 reference genomes were indexed using Bowtie2-build v2.3.4.3 [46]. Trimmed reads were  
186 aligned to their respective reference genomes using Bowtie2 v2.3.4.3 [46] using default  
187 parameters. The resulting SAM files were converted to BAM files using Samtools view v1.9  
188 [47] and sorted and indexed using the default settings of respectively Samtools sort and  
189 Samtools index v1.9 [47]. Using the sorted BAM file, a pileup file was generated with  
190 Samtools mpileup v1.9 [47] using the options "--count-orphans" and "--VCF". Next, the  
191 variants were called with bcftools call v1.9 [47] using the options "-O z", "--consensus-caller",  
192 "--variants-only" and "ploidy 1", and converted and indexed to uncompressed VCF files with  
193 respectively bcftools view v1.9 [47] using the options "--output-type v" and bcftools index  
194 v1.9 [47] using the option "--force". Lastly, a temporary consensus sequence was generated  
195 using bcftools consensus v1.9 [47] with default settings, providing the reference genome and  
196 produced VCF file as inputs. Afterwards, the previous steps were repeated once with the  
197 same options using the generated temporary consensus sequence as fasta reference to  
198 generate the final consensus sequence. These sequences were used to confirm either the  
199 presence or absence of the clade-defining mutations of the B.1.1.7 mutant for both the  
200 mutant and wild-type samples respectively (Table 1). To extract the sequencing coverage for  
201 each position and subsequently calculate the median coverage for each sample, Samtools  
202 depth v1.9 [47] was used on the BAM files. Additionally, bamreadcount v0.8.0  
203 (<https://github.com/genome/bam-readcount>) was run on all samples using the BAM files to  
204 determine the coverage at each position.

205 **Table 1: Mutations linked to SARS-CoV-2 lineage B.1.1.7 [48].**

| Gene          | Nucleotide-level mutation | Amino Acid-level mutation | Number of amplicons covering the position? |
|---------------|---------------------------|---------------------------|--------------------------------------------|
| <b>ORF1ab</b> | C913T                     | Synonymous                | 1                                          |
|               | C3267T                    | T1001I                    | 1                                          |
|               | C5388A                    | A1708D                    | 1                                          |
|               | C5986T                    | Synonymous                | 1                                          |
|               | T6954C                    | I2230T                    | 1                                          |
|               | 11288-11296 deletion      | SGF 3675-3677 deletion    | 1                                          |
|               | C14676T                   | Synonymous                | 1                                          |
|               | C15279T                   | Synonymous                | 1                                          |
|               | C16176T                   | Synonymous                | 2                                          |
| <b>S</b>      | 21765-21770 deletion      | HV 69-70 deletion         | 1                                          |
|               | 21991-21993 deletion      | Y144 deletion             | 2                                          |
|               | A23063T                   | N501Y                     | 1                                          |
|               | C23271A                   | A570D                     | 1                                          |
|               | C23604A                   | P681H                     | 1                                          |
|               | C23709T                   | T716I                     | 1                                          |
|               | T24506G                   | S982A                     | 1                                          |
|               | G24914C                   | D1118H                    | 2                                          |
| <b>M</b>      | G26801C*                  | Synonymous                | 1                                          |
| <b>Orf8</b>   | C27972T                   | Q27stop                   | WT: 2; B.1.1.7: 1**                        |
|               | G28048T                   | R52I                      | 1                                          |
|               | A28111G                   | Y73C                      | 2                                          |
| <b>N</b>      | G28280C                   | D3L                       | 2                                          |
|               | A28281T                   |                           |                                            |
|               | T28282A                   |                           |                                            |
|               | C28977T                   | S235F                     | 1                                          |

206 The first, second, and third columns present respectively the gene name, cDNA-level mutation and protein-level  
207 mutation. The last column describes whether the position is covered by one or two amplicons from the  
208 enrichment panel (Supplementary Table S1). (\*) One adaptation was observed for position 26 801. In the wild-  
209 type strains a G was observed in contrast to Rambaut et al. where a T was observed. (\*\*) Due to the tiled  
210 amplicon approach used to amplify the samples prior to sequencing, the regions where amplicons overlapped  
211 resulted in a double coverage. Mutation C27972T was positioned in such an overlap in the wild-type, but not in  
212 the mutant. (WT = wild-type).

213 From the initial 316 samples, ten mutant samples were selected that presented similar  
214 coverage depth at the positions of interest after normalization (see below). These samples  
215 contained the mutations assigned to the B.1.1.7 variant. Ten wild-type samples were also  
216 chosen that did not contain any of these mutations (Table 1, Table 2) and also presented  
217 similar coverage depth at the positions of interest after normalization. Lineage B.1.1.7,  
218 termed Variant of Concern (VOC) 202012/01 by Public Health England (PHE) [49],

20I/501Y.V1 by Nextstrain [50] and alpha variant by the World Health Organisation [51], was first reported in the United Kingdom but its prevalence continues to rise in many European countries [52]. This variant was found to be more transmissible [17] and may cause more severe infections [18, 19]. Lineage B.1.1.7 is defined by multiple spike protein changes, including deletion 69-70 and deletion 144 in the N-terminal domain, amino changes N501Y in the receptor-binding domain, and amino acid changes A570D, P681H, T716I, S982A, D1118H, as well as mutations in other genomic regions [53]. More recently PHE has reported B.1.1.7 cases with an additional mutation, E484K [49]. Median coverages of the selected samples were consistently high (minimum 13,848; maximum 36,255) and median read lengths were always 221 and 201 for the forward and reverse reads respectively (Table 2). Additionally, as suggested by ECDC, more than 95% of the genome was covered by reads with a minimal coverage of 500X [31].

**Table 2: List of SRA accession numbers used for employed wild-type and lineage B.1.1.7 samples in this study.**

| Sample     | WT/lineage B.1.1.7 | Median coverage |
|------------|--------------------|-----------------|
| ERR5058968 | lineage B.1.1.7    | 13,848          |
| ERR5059033 | lineage B.1.1.7    | 21,874          |
| ERR5059072 | lineage B.1.1.7    | 14,628          |
| ERR5059092 | lineage B.1.1.7    | 16,106          |
| ERR5059123 | lineage B.1.1.7    | 17,349          |
| ERR5059204 | lineage B.1.1.7    | 18,149          |
| ERR5059226 | lineage B.1.1.7    | 22,194          |
| ERR5059238 | lineage B.1.1.7    | 27,681          |
| ERR5059260 | lineage B.1.1.7    | 23,975          |
| ERR5059282 | lineage B.1.1.7    | 27,349          |

|                   |    |        |
|-------------------|----|--------|
| <b>ERR5039162</b> | WT | 20,071 |
| <b>ERR5040499</b> | WT | 24,440 |
| <b>ERR5059083</b> | WT | 18,220 |
| <b>ERR5059114</b> | WT | 14,580 |
| <b>ERR5059133</b> | WT | 19,866 |
| <b>ERR5059154</b> | WT | 28,295 |
| <b>ERR5059253</b> | WT | 23,798 |
| <b>ERR5059257</b> | WT | 25,894 |
| <b>ERR5059283</b> | WT | 36,255 |
| <b>ERR5059286</b> | WT | 29,847 |

233 Sample IDs, categorized as WT or mutant and the median coverage calculated using Samtools depth v1.9 [47].

234 (WT = wild-type)

## 235 **2.2 LFV detection**

236 The absence of pre-existing wild-type and mutant LFV at the positions defining lineage  
 237 B.1.1.7 (Table 1) was verified in both the mutant and wild-type samples (Figure 1: Step 3),  
 238 respectively, by calling all LFV in these samples and subsequently checking the positions of  
 239 interest. Python 3.6.9 was used with the packages pysam 0.16.0.1 [54] and numpy 1.19.5  
 240 [55]. Each generated (final) consensus FASTA file was used as reference for its respective  
 241 sample and indexed using Samtools faidx v1.9 [47] and Bowtie2-build v2.3.4.3. Bowtie2  
 242 v2.3.4.3 was then used to align the reads of each sample to its reference sequence,  
 243 producing a SAM file that was converted into BAM using Samtools view v1.9. Next, reads  
 244 were sorted using Picard SortSam v2.18.14 (<https://github.com/broadinstitute/picard>) with  
 245 the option “SORT\_ORDER=coordinate” and Picard CreateSequenceDictionary v2.18.14 [56]  
 246 was used to generate a dictionary of the reference FASTA file. Picard  
 247 AddOrReplaceReadGroups v2.18.14 [56] was afterwards run on the reads with the flags  
 248 “LB”, “PL”, “PU” and “SM” set to the arbitrary placeholder value “test”. The resulting BAM

files were indexed using Samtools index v1.9 and used as input for GATK RealignerTargetCreator 3.7 [57], which was followed by indel realignment using GATK IndelRealigner v3.7 [57]. Next, generated BAM files were indexed using Samtools index v1.9. The call function of the LoFreq v2.1.3.1 package [36] was used to call LFV in the BAM files and generate a VCF file using the options “--call-indels” and “--no-default-filter” and using the consensus sequence as reference to call LFV. Next, the unfiltered VCF file was filtered using the filter function of the LoFreq v2.1.3.1 package, setting the strand bias threshold for reporting a variant to the maximum allowed value by using the option “--sb-thresh 2147483647” to allow highly strand-biased variants to be retained, to account for the non-random distribution of reads due to the design of the amplification panel. All employed scripts are available in Supplementary File S2. Additionally, the workflow is also available at the public Galaxy instance of our institute at <https://galaxy.sciensano.be> as a free resource for academic and non-profit usage. The presence of the nucleotides assigned to the B.1.1.7 lineage or the wild-type (Table 1) was verified for the mutant and wild-type samples, respectively. Additionally, it was checked that there were no LFV at these positions, so that the wild-type nucleotide or mutant nucleotide was always present at 100% for the retained 10 WT and 10 mutant samples.

## 2.2.1 Dataset 1: *In silico* insertion of mutations of interest into raw sequencing datasets

For the first dataset (Figure 1: Step 4), all low-frequency single nucleotide polymorphisms (SNPs) were removed from the raw sequencing data of all samples. SNPs were removed using Jvarkit employing biostar404363 [58] by converting all nucleotides to the consensus fasta sequence. Next, all ten WT samples were down-sampled using “seqtk sample” with argument “-s100” (<https://github.com/lh3/seqtk>) to 14 different (median) coverages (100X, 250X, 500X, 750X, 1000X, 1500X, 2000X, 2500X, 3000X, 3500X, 4000X, 4500X, 5000X and 10,000X). The 22 SNP mutations characteristic for the B.1.1.7 lineage (Table 1) were introduced at 26 different AF (mutant: 0%, 0.5%, 1%, 1.5%, 2%, 2.5%, 3%, 3.5%, 4%, 4.5%,

5%, 5.5%, 6%, 6.5%, 7%, 7.5%, 8%, 8.5%, 9%, 9.5%, 10%, 20%, 30%, 40%, 50%, 100%) at the various coverages mentioned above employing biostar404363. This resulted in 10 samples at 364 conditions (i.e. combination of coverage and AF). Next, all reads containing indels were removed from these samples using samtools view v1.9. Finally, the three deletions associated with the B.1.1.7 lineage were introduced at the 26 AF mentioned above using BAMSurgeon 1.2 [59], which was adapted to decrease runtime, with the options “-p 10”, “--force”, “-d 0”, “--ignorepileup”, “--mindepth 1”, “--minmutreads 1”, “--maxdepth 1000000”, “--aligner mem”, “--tagreads”. A minority of reads that were lacking a mate in the targeted regions were removed by using an in-house script making use of Python 3.6.9 and the package pysam 0.16.0.1. Samples in BAM format were then converted back to FASTQ format using bedtools bamtofastq v2.27.1 [60]. Finally the LFV detection workflow (Figure 1: Step 3) described in section 2.2 was used on these 10 samples for all 364 conditions using the FASTA file of the wild-type sample as reference with LoFreq.

## 2.2.2 Dataset 2: Introduction of mutations of interest by mixing wild-type and mutant raw sequencing read datasets

For the second dataset (Figure 1: Step 5), the coverage of all 20 samples (Table 2) was normalized to 5000X using BBMap v38.89 bbnorm.sh [43] with the options “target=5000”, “mindepth=5”, “fixspikes=f”, “passes=3”, “uselowerdepth=t”. However, due to the tiled amplicon approach used to amplify these samples prior to sequencing, regions where amplicons overlapped subsequently had double coverage resulting in two coverages, i.e. 5000X and 10,000X, after normalization (Supplementary Table S1). *In silico* datasets were then generated by mixing the appropriate number of reads for every combination of the ten wild-type and ten mutant samples, resulting in a total of 100 mixed samples, which were down-sampled using “seqtk sample” (with option “-s100”) to the appropriate fractions for the required combination of 13 final coverages (100X, 250X, 500X, 750X, 1000X, 1500X, 2000X, 2500X, 3000X, 3500X, 4000X, 4500X and 5000X) and 26 AF (mutant: 0%, 0.5%, 1%, 1.5%, 2%, 2.5%, 3%, 3.5%, 4%, 4.5%, 5%, 5.5%, 6%, 6.5%, 7%, 7.5%, 8%, 8.5%, 9%,

303 9.5%, 10%, 20%, 30%, 40%, 50%, 100%). This resulted in 100 mixed samples at 338  
304 conditions (i.e. combination of coverage and AF). Finally, the LFV detection workflow (Figure  
305 1: Step 3) described in section 2.2 was used on these samples for all conditions using the  
306 FASTA file of the wild-type sample as reference, except for samples mimicking 100% AF for  
307 the mutant positions where the FASTA file of the mutant sample was used.

308 Although the second dataset was normalized for total coverage at every genomic position,  
309 the tiled amplicon approach resulted in some genomic positions being covered by two  
310 overlapping amplicons. Two groups of mutations were therefore obtained for every coverage  
311 (Table 2), i.e. for a targeted coverage of 5000X, 17 mutations were present at ~5000X  
312 (C913T, C3267T, C5388A, C5986T, T6954C, 11288-11296 deletion, C14676T, C15279T,  
313 21765-21770 deletion, A23063T, C23271A, C23604A, C23709T, T24056G, G26801C,  
314 G28048T, C28977T) and 7 mutations were present at ~10,000X (T16176C, 21991-21993  
315 deletion, G24914C, A28111G, G28280C, A28281T, T28282A). Mutation C27972T was  
316 excluded from further analysis, because this position in the wild-type samples was located in  
317 a region where amplicons overlapped resulting in a coverage of approximately 10,000X,  
318 while in mutant samples it was in a region with no overlap and where a coverage of 5000X  
319 was therefore observed (Supplementary Table S1). For further analysis, the results were  
320 pooled together per theoretical coverage resulting in 24 mutations per coverage but only 17  
321 and 7 mutations at the lowest (i.e. 100X) and highest (i.e. 10,000X) coverage, respectively  
322 (Supplementary Table S2). The actual median coverage was calculated per theoretical  
323 targeted coverage using the output of bamreadcount v0.8.0 of each sample. Using this  
324 output, the coverage of each position of interest was extracted (Supplementary Table S2).

### 325 **2.3 Qualitative evaluation of detection of B.1.1.7 at different abundances**

326 Since samples of Dataset 1 were normalized for the total median coverage, different  
327 individual positions of interest could exhibit deviating coverages. For the qualitative  
328 evaluation of LFV detection (i.e. can mutant positions of interest be correctly detected?), the  
329 number of false negatives were counted per condition (i.e. combination of AF and coverage)

and divided by the total number of observations (i.e. the number of samples ( $n=10$ ) and number of mutations considered for that condition ( $n=25$ )). A mutant position of interest was considered as correctly detected as soon as it was detected by LoFreq, irrespective of its estimated AF.

Dataset 2 was subjected to the same qualitative evaluation as described for Dataset 1. The number of false negatives per condition was divided by the number of observations (i.e. the number of samples ( $n=100$ ) and number of mutations considered for that condition (either  $n=7$ ,  $n=17$  or  $n=24$ )).

The visualisation of the qualitative evaluation was performed using a contour plot from the R package plotly (RStudio 1.0.153; R3.6.1) [61]. The false negative (FN) proportion in the qualitative evaluation plots ranged from 0 to 1 with a step size of 0.1.

## 2.4 Quantitative evaluation of detection of B.1.1.7 at different abundances

For the quantitative evaluation of LFV detection (i.e. is the estimated AF of correctly detected mutant positions of interest close to the true AF?) of both datasets, FN values were considered as 'below the quantification limit' with the quantification limit equal to the lowest recorded value for that condition (i.e. combination of AF and coverage). Outliers were identified for each condition using the Grubbs test that was sequentially applied by first searching for two outliers at the same side, followed by a search for exactly one outlier. If the p-value of the Grubbs test was below 0.05, outliers were excluded. The standard deviation (SD) and mean value of AF for every condition were estimated by a maximum likelihood model based on the normal distribution that took the FN into account as censor data. Data were modelled according to a normal distribution. If the percentage of FN results was above 75%, the condition was however excluded from quantitative evaluation. Finally, a performance metric describing closeness to the true AF was calculated for each targeted AF individually by dividing each pooled squared SD by the maximal pooled squared SD. This metric will range between 0, relatively the closest to the targeted AF, and 1, relatively the furthest from the targeted AF.



As described for the qualitative evaluation, contour plots from the R package plotly (RStudio 1.0.153; R3.6.1) were used for the visualisation of the quantitative evaluation. The performance metric in the quantitative evaluation plots ranged from 0 to 1 with a step size of 0.1.

### 3 Results

#### 3.1 Qualitative evaluation demonstrates that B.1.1.7 clade-defining mutations can be reliably detected at low AF when sequencing coverage is adequately high

To mimic targeted SARS-CoV-2 sequencing with a VOC present at low abundances in the viral population, B.1.1.7 clade-defining mutations were first *in silico* introduced at well-defined AFs and coverages in real sequencing data ('Dataset 1') of ten wild-type samples, without however using any coverage normalization so that individual mutations could be present at higher or lower coverages compared to the total median genomic coverage due to unevenness of coverage. To assess whether introduced mutations were correctly detected, or alternatively missed as FN, samples of this dataset were analysed using a LFV calling workflow based on LoFreq.

Figure 2A depicts the proportion of FN observations, and corresponding values are presented in Table 3, for all evaluated coverages and targeted AFs until 20%. Results for all targeted AFs (including higher values) are presented in Supplementary Figure S1 and Supplementary Table S3. All LFV could be detected at an AF of 1% at a median coverage of 10,000X. As the coverage decreased, the AF threshold at which no single FN occurred (i.e. perfect sensitivity) increased to 1.5% at 5000X, 3% at 1000X, 5% at 500X, 9.5% at 250X, and 20% at 100X. When allowing a maximum of 10% FN (i.e. sensitivity of 90%), the AF thresholds decreased substantially to 1% at 5000X, 1.5% at 1000X, 2.5% at 500X, 4% at 250X, and 7.5% at 100X. No false positive mutations related to the mutant and wild-type were observed at respectively 0% and 100% AF.

383 A second approach was also considered for mimicking targeted SARS-CoV-2 virus  
384 sequencing with a VOC present at low abundances, by *in silico* mixing real raw sequencing  
385 reads from ten B.1.1.7 samples into ten wild-type samples ('Dataset 2') for a total of 100  
386 mixes at well-defined AFs and coverages, while applying coverage normalization so that  
387 individual mutations were present at approximately similar coverages for all B.1.1.7 clade-  
388 defining positions.

389 Figure 2B depicts the proportion of FN observations, and actual values are presented in  
390 Table 4, for all evaluated coverages and targeted AF until 20%. Results for higher targeted  
391 AF are presented in Supplementary Figure S2 and Supplementary Table S4. All LFV could  
392 be detected at an AF of 1% at a median coverage of 9792X. As the coverage decreased, the  
393 AF thresholds at which no single FN occurred (i.e. perfect sensitivity) increased to 1.5% at  
394 4851X, 3.5% at 969X, 4% at 482X, 7% at 237X, and 20% at 97X. However, when allowing a  
395 maximum of 10% FN (i.e. reducing the sensitivity to 90%), the AF thresholds decreased  
396 substantially to 1% at 4851X, 2% at 969X, 3% at 482X, 4% at 237X, and 7% at 97X. No  
397 false positive mutations related to the mutant and wild-type were observed at 0% and 100%.  
398 Overall, the results for Dataset 1, using the median coverages, and Dataset 2, using the  
399 coverages at the positions of interest, were qualitatively similar.

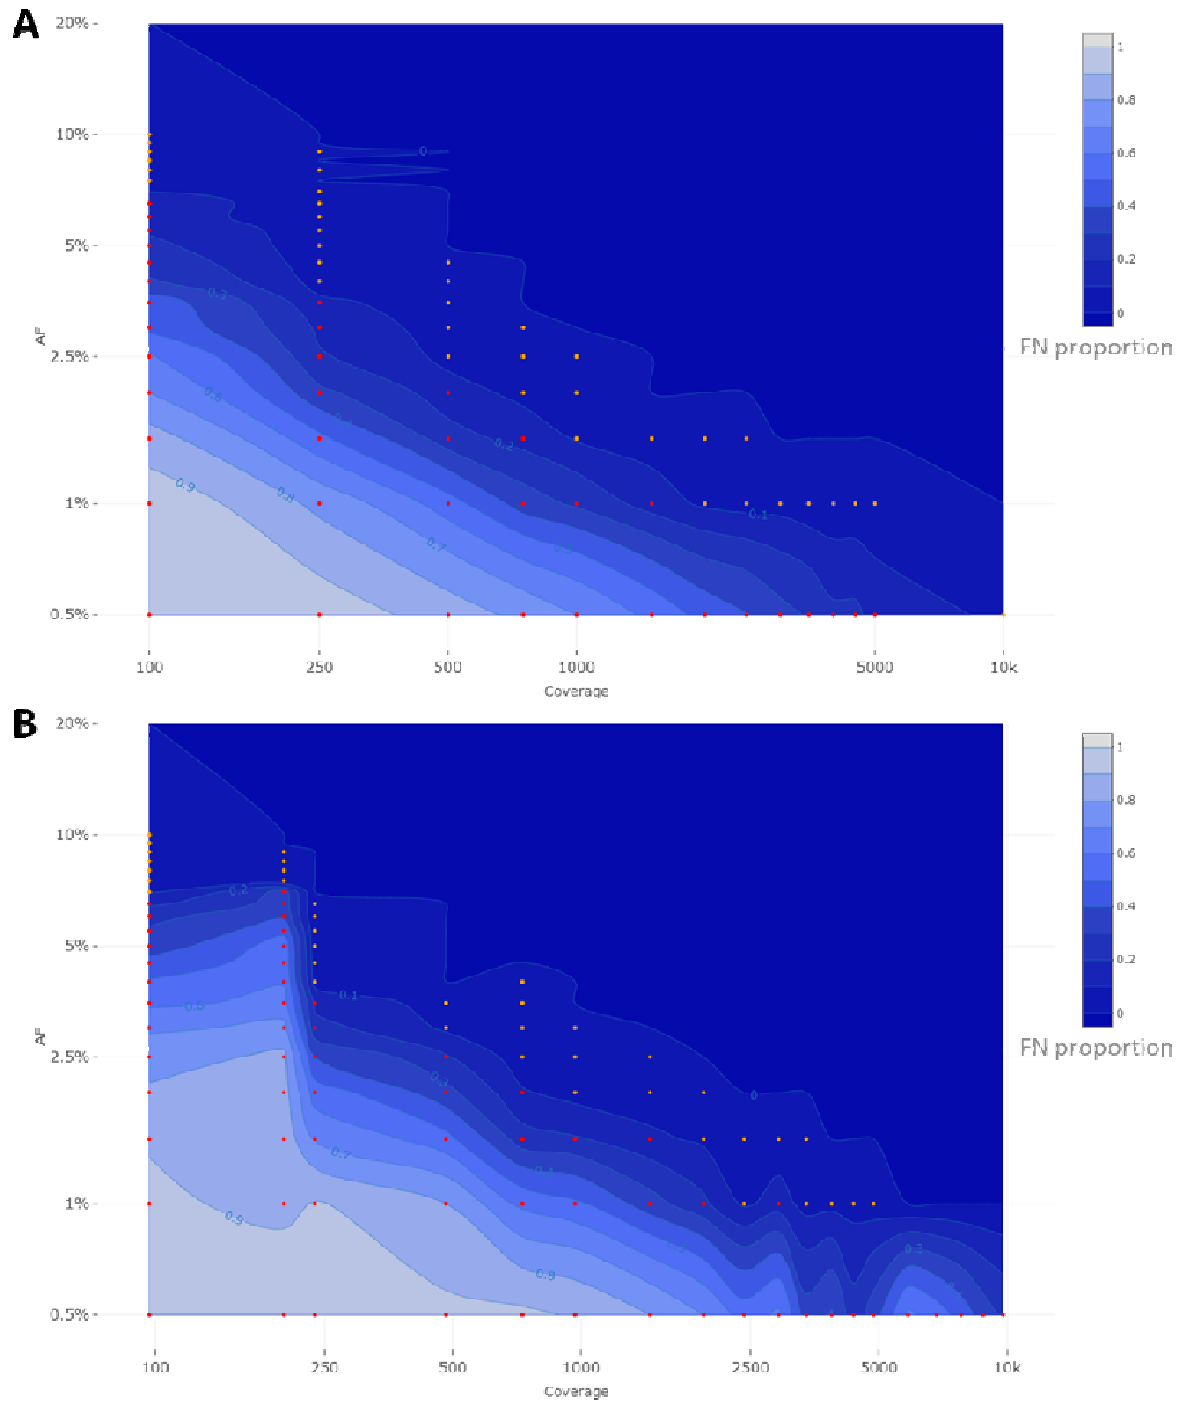

**Figure 2: Qualitative evaluation of Dataset 1 (A) and Dataset 2 (B) based on false negative proportions per condition until a targeted mutant AF of 20%.** Orange and red dots represent conditions with a FN proportion between 0 and 0.1, and between 0.1 and 1, respectively. The percentage of FN is coloured ranging from 0 (dark) to 1 (light) in intervals of 0.1 as extrapolated using a contour plot in the R package plotly [61] (actual FN proportions are presented in Table 3 for Dataset 1 and Table 4 for Dataset 2). Results for targeted mutant AF

406 values >20% are presented in Supplementary Figure S1 for Dataset 1 and Supplementary Figure S2 for Dataset  
407 2. Both the x- and y-axis follow a logarithmic scale.

| Coverage →<br>AF ↓ | 100 | 250 | 500 | 750 | 1000 | 1500 | 2000 | 2500 | 3000 | 3500 | 4000 | 4500 | 5000 | 10,000 |
|--------------------|-----|-----|-----|-----|------|------|------|------|------|------|------|------|------|--------|
| 20.00%             | 0%  | 0%  | 0%  | 0%  | 0%   | 0%   | 0%   | 0%   | 0%   | 0%   | 0%   | 0%   | 0%   | 0%     |
| 10.00%             | 5%  | 0%  | 0%  | 0%  | 0%   | 0%   | 0%   | 0%   | 0%   | 0%   | 0%   | 0%   | 0%   | 0%     |
| 9.50%              | 4%  | 0%  | 0%  | 0%  | 0%   | 0%   | 0%   | 0%   | 0%   | 0%   | 0%   | 0%   | 0%   | 0%     |
| 9.00%              | 7%  | 1%  | 0%  | 0%  | 0%   | 0%   | 0%   | 0%   | 0%   | 0%   | 0%   | 0%   | 0%   | 0%     |
| 8.50%              | 4%  | 0%  | 0%  | 0%  | 0%   | 0%   | 0%   | 0%   | 0%   | 0%   | 0%   | 0%   | 0%   | 0%     |
| 8.00%              | 9%  | 2%  | 0%  | 0%  | 0%   | 0%   | 0%   | 0%   | 0%   | 0%   | 0%   | 0%   | 0%   | 0%     |
| 7.50%              | 8%  | 0%  | 0%  | 0%  | 0%   | 0%   | 0%   | 0%   | 0%   | 0%   | 0%   | 0%   | 0%   | 0%     |
| 7.00%              | 10% | 1%  | 0%  | 0%  | 0%   | 0%   | 0%   | 0%   | 0%   | 0%   | 0%   | 0%   | 0%   | 0%     |
| 6.50%              | 15% | 2%  | 0%  | 0%  | 0%   | 0%   | 0%   | 0%   | 0%   | 0%   | 0%   | 0%   | 0%   | 0%     |
| 6.00%              | 15% | 1%  | 0%  | 0%  | 0%   | 0%   | 0%   | 0%   | 0%   | 0%   | 0%   | 0%   | 0%   | 0%     |
| 5.50%              | 19% | 3%  | 0%  | 0%  | 0%   | 0%   | 0%   | 0%   | 0%   | 0%   | 0%   | 0%   | 0%   | 0%     |
| 5.00%              | 22% | 3%  | 0%  | 0%  | 0%   | 0%   | 0%   | 0%   | 0%   | 0%   | 0%   | 0%   | 0%   | 0%     |
| 4.50%              | 26% | 4%  | 2%  | 0%  | 0%   | 0%   | 0%   | 0%   | 0%   | 0%   | 0%   | 0%   | 0%   | 0%     |
| 4.00%              | 31% | 6%  | 1%  | 0%  | 0%   | 0%   | 0%   | 0%   | 0%   | 0%   | 0%   | 0%   | 0%   | 0%     |
| 3.50%              | 45% | 12% | 4%  | 0%  | 0%   | 0%   | 0%   | 0%   | 0%   | 0%   | 0%   | 0%   | 0%   | 0%     |
| 3.00%              | 47% | 18% | 4%  | 1%  | 0%   | 0%   | 0%   | 0%   | 0%   | 0%   | 0%   | 0%   | 0%   | 0%     |
| 2.50%              | 62% | 21% | 7%  | 2%  | 2%   | 0%   | 0%   | 0%   | 0%   | 0%   | 0%   | 0%   | 0%   | 0%     |
| 2.00%              | 70% | 32% | 14% | 7%  | 3%   | 0%   | 0%   | 0%   | 0%   | 0%   | 0%   | 0%   | 0%   | 0%     |
| 1.50%              | 84% | 52% | 24% | 16% | 9%   | 5%   | 1%   | 2%   | 0%   | 0%   | 0%   | 0%   | 0%   | 0%     |
| 1.00%              | 96% | 77% | 54% | 35% | 28%  | 15%  | 8%   | 6%   | 6%   | 3%   | 2%   | 2%   | 2%   | 0%     |
| 0.50%              | 98% | 95% | 85% | 77% | 70%  | 57%  | 46%  | 41%  | 33%  | 29%  | 22%  | 22%  | 16%  | 7%     |
| 0.00%              | 0%  | 0%  | 0%  | 0%  | 0%   | 0%   | 0%   | 0%   | 0%   | 0%   | 0%   | 0%   | 0%   | 0%     |

408 **Table 3: Qualitative evaluation of Dataset 1 based on false negative proportions per condition until a**  
409 **targeted mutant AF of 20%. The percentage of FN is coloured ranging from 0 (dark) to 1 (light) according to the**  
410 **gradient depicted in Figure 2A.**

| Coverage →<br>AF ↓ | 97  | 201 | 237 | 482 | 728 | 969 | 1454 | 1937 | 2413 | 2904 | 3383 | 3872 | 4358 | 4851 | 5855 | 6834 | 7801 | 8790 | 9792 |
|--------------------|-----|-----|-----|-----|-----|-----|------|------|------|------|------|------|------|------|------|------|------|------|------|
| 20.00%             | 0%  | 0%  | 0%  | 0%  | 0%  | 0%  | 0%   | 0%   | 0%   | 0%   | 0%   | 0%   | 0%   | 0%   | 0%   | 0%   | 0%   | 0%   | 0%   |
| 10.00%             | 2%  | 0%  | 0%  | 0%  | 0%  | 0%  | 0%   | 0%   | 0%   | 0%   | 0%   | 0%   | 0%   | 0%   | 0%   | 0%   | 0%   | 0%   | 0%   |
| 9.50%              | 3%  | 0%  | 0%  | 0%  | 0%  | 0%  | 0%   | 0%   | 0%   | 0%   | 0%   | 0%   | 0%   | 0%   | 0%   | 0%   | 0%   | 0%   | 0%   |
| 9.00%              | 5%  | 1%  | 0%  | 0%  | 0%  | 0%  | 0%   | 0%   | 0%   | 0%   | 0%   | 0%   | 0%   | 0%   | 0%   | 0%   | 0%   | 0%   | 0%   |
| 8.50%              | 6%  | 1%  | 0%  | 0%  | 0%  | 0%  | 0%   | 0%   | 0%   | 0%   | 0%   | 0%   | 0%   | 0%   | 0%   | 0%   | 0%   | 0%   | 0%   |
| 8.00%              | 8%  | 1%  | 0%  | 0%  | 0%  | 0%  | 0%   | 0%   | 0%   | 0%   | 0%   | 0%   | 0%   | 0%   | 0%   | 0%   | 0%   | 0%   | 0%   |
| 7.50%              | 8%  | 1%  | 0%  | 0%  | 0%  | 0%  | 0%   | 0%   | 0%   | 0%   | 0%   | 0%   | 0%   | 0%   | 0%   | 0%   | 0%   | 0%   | 0%   |
| 7.00%              | 9%  | 34% | 0%  | 0%  | 0%  | 0%  | 0%   | 0%   | 0%   | 0%   | 0%   | 0%   | 0%   | 0%   | 0%   | 0%   | 0%   | 0%   | 0%   |
| 6.50%              | 18% | 35% | 1%  | 0%  | 0%  | 0%  | 0%   | 0%   | 0%   | 0%   | 0%   | 0%   | 0%   | 0%   | 0%   | 0%   | 0%   | 0%   | 0%   |
| 6.00%              | 28% | 38% | 1%  | 0%  | 0%  | 0%  | 0%   | 0%   | 0%   | 0%   | 0%   | 0%   | 0%   | 0%   | 0%   | 0%   | 0%   | 0%   | 0%   |

|       |      |     |     |     |     |     |     |     |     |     |     |     |     |     |     |     |     |     |
|-------|------|-----|-----|-----|-----|-----|-----|-----|-----|-----|-----|-----|-----|-----|-----|-----|-----|-----|
| 5.50% | 31%  | 47% | 3%  | 0%  | 0%  | 0%  | 0%  | 0%  | 0%  | 0%  | 0%  | 0%  | 0%  | 0%  | 0%  | 0%  | 0%  | 0%  |
| 5.00% | 35%  | 56% | 3%  | 0%  | 0%  | 0%  | 0%  | 0%  | 0%  | 0%  | 0%  | 0%  | 0%  | 0%  | 0%  | 0%  | 0%  | 0%  |
| 4.50% | 43%  | 57% | 4%  | 0%  | 0%  | 0%  | 0%  | 0%  | 0%  | 0%  | 0%  | 0%  | 0%  | 0%  | 0%  | 0%  | 0%  | 0%  |
| 4.00% | 51%  | 59% | 6%  | 0%  | 1%  | 0%  | 0%  | 0%  | 0%  | 0%  | 0%  | 0%  | 0%  | 0%  | 0%  | 0%  | 0%  | 0%  |
| 3.50% | 58%  | 63% | 18% | 4%  | 1%  | 0%  | 0%  | 0%  | 0%  | 0%  | 0%  | 0%  | 0%  | 0%  | 0%  | 0%  | 0%  | 0%  |
| 3.00% | 68%  | 73% | 23% | 8%  | 2%  | 1%  | 0%  | 0%  | 0%  | 0%  | 0%  | 0%  | 0%  | 0%  | 0%  | 0%  | 0%  | 0%  |
| 2.50% | 77%  | 82% | 40% | 21% | 4%  | 3%  | 1%  | 0%  | 0%  | 0%  | 0%  | 0%  | 0%  | 0%  | 0%  | 0%  | 0%  | 0%  |
| 2.00% | 81%  | 84% | 55% | 33% | 11% | 6%  | 4%  | 1%  | 0%  | 0%  | 0%  | 0%  | 0%  | 0%  | 0%  | 0%  | 0%  | 0%  |
| 1.50% | 89%  | 86% | 69% | 53% | 24% | 21% | 12% | 8%  | 4%  | 2%  | 1%  | 0%  | 0%  | 0%  | 0%  | 0%  | 0%  | 0%  |
| 1.00% | 92%  | 86% | 91% | 80% | 57% | 52% | 34% | 22% | 8%  | 15% | 6%  | 7%  | 6%  | 4%  | 0%  | 0%  | 0%  | 0%  |
| 0.50% | 100% | 98% | 98% | 92% | 92% | 89% | 80% | 70% | 55% | 62% | 34% | 41% | 24% | 35% | 62% | 55% | 46% | 35% |
| 0.00% | 0%   | 0%  | 0%  | 0%  | 0%  | 0%  | 0%  | 0%  | 0%  | 0%  | 0%  | 0%  | 0%  | 0%  | 0%  | 0%  | 0%  | 0%  |

**Table 4: Qualitative evaluation of Dataset 2 based on false negative proportions per condition until a targeted mutant AF of 20%.** The percentage of FN is coloured ranging from 0 (dark) to 1 (light) according to the gradient depicted in Figure 2B.

### 3.2 Quantitative evaluation demonstrates that the resulting AFs for B.1.1.7 clade-defining mutations are close to their target values

To evaluate the possibility of quantifying LFV in both datasets, the SDs of available observations were first evaluated for each condition (i.e. combination of AF and coverage). This provisional analysis indicated that for both Dataset 1 (Supplementary File S3) and Dataset 2 (Supplementary File S4), the SD systematically decreased per target AF as coverage increased. This provisional analysis also indicated that for both datasets, irrespective of coverage, the SD generally increased between a targeted AF of 1% to 10%, after which it plateaued for targeted AFs above 20%. We therefore employed the squared SD per AF divided by the maximal squared SD per target AF to describe closeness of observed AF to the true AF, for which results are presented in Figure 3A for Dataset 1. As expected, the variation in AF estimates fluctuates in function of the median coverage and targeted AF, with variation decreasing per target AF as coverage increased, but also variation being generally more pronounced at low AFs irrespective of coverage. Notwithstanding, even for regions in Figure 3A exhibiting high variation, the variability overall remained small (Supplementary File S3). The interquartile range (IQR) (Supplementary File S3D) of the observed AF was still limited at the various targeted AF ranging from 0.62%-

431 6.26% at an AF of 50%, 0.36%-3.49% at an AF of 10% and 0.27%-2.07% at an AF of 5%  
432 with the highest IQR observed at lower coverages.

433 Results for the quantitative evaluation of Dataset 2 are presented in Figure 3B, and are in  
434 accordance with the trends observed for Dataset 1 with the variation decreasing per target  
435 AF as coverage increased, and lower target AFs exhibiting increasing variation irrespective  
436 of coverage. Notwithstanding, similarly to Dataset 1, the observed total variation remained  
437 small (Supplementary File S4). The IQR (Supplementary File S4D) of the observed AF was  
438 limited at the various targeted AF ranging from 0.73%-3.93% at an AF of 50%, 0.41%-3.93%  
439 at an AF of 10% and 0.29%-2.27% at an AF of 5% with the highest IQR observed at lower  
440 coverages.

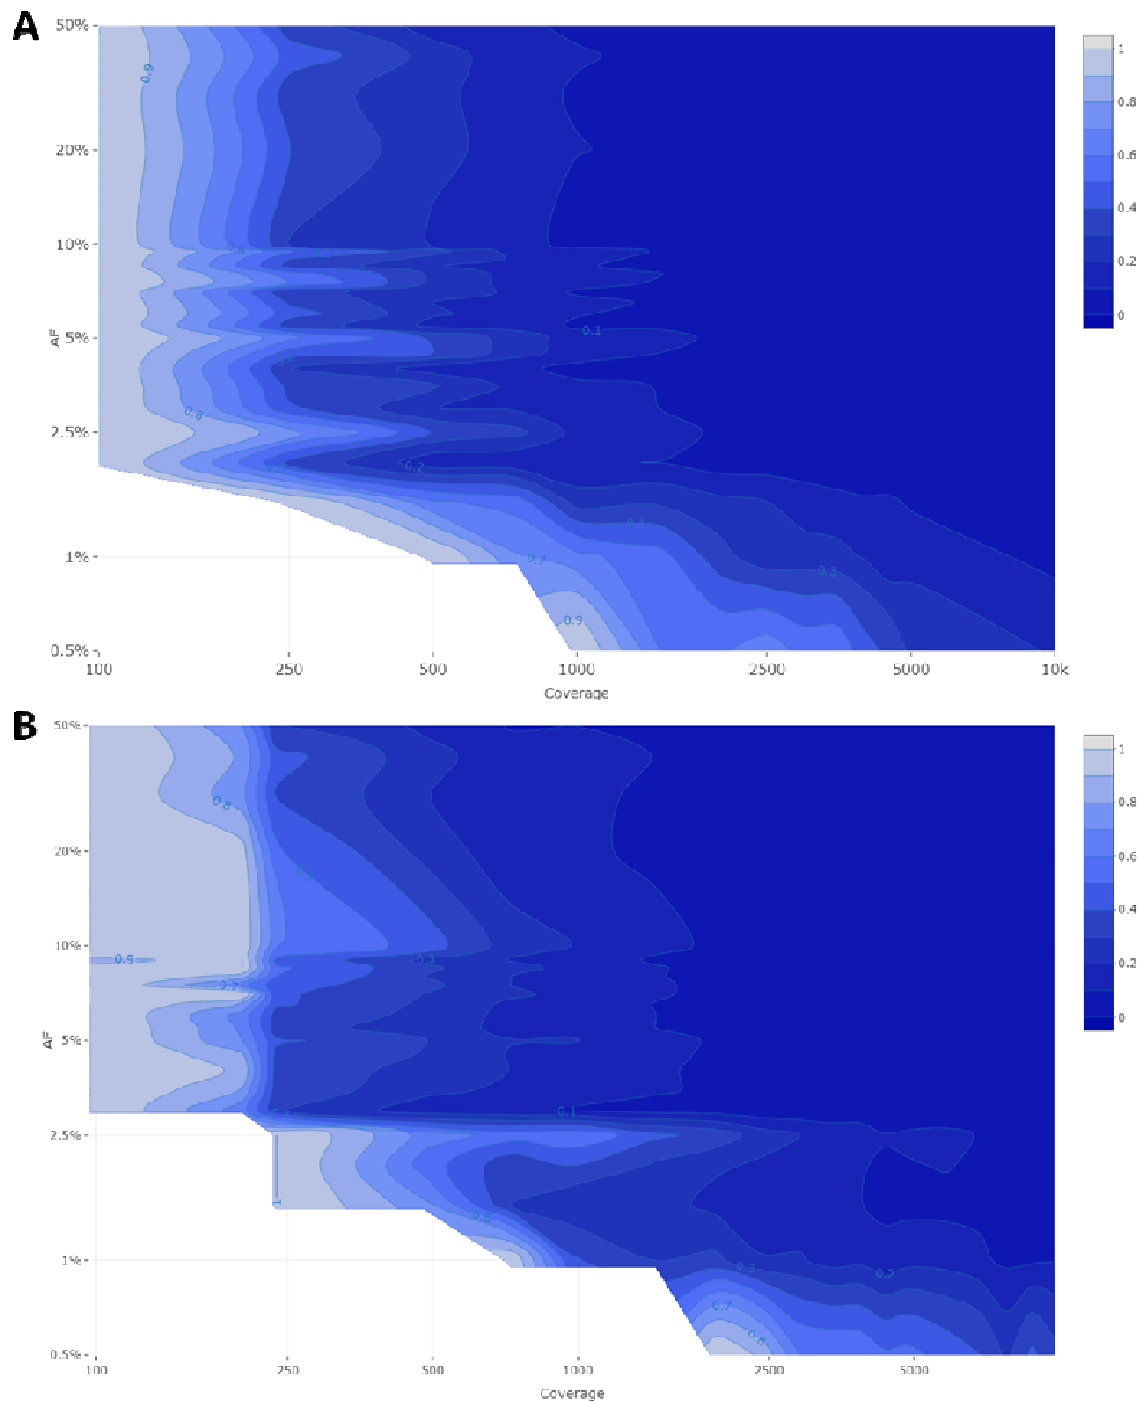

**Figure 3: Quantitative evaluation of Dataset 1 (A) and Dataset 2 (B) using the squared SD divided by the maximal squared SD per targeted AF.** The figure is coloured ranging from 0 (dark) to 1 (light) in intervals of 0.1 as extrapolated using a contour plot in the R package plotly [61] (actual values are presented in Supplementary File S3 for Dataset 1 and Supplementary File S4 for Dataset 2). Both the x- and y-axis follow a logarithmic scale. Conditions with a FN proportion higher than 75% were excluded and correspond to the white plane in the lower left corner.

## 4 Discussion

Wastewater surveillance has been recommended to be used in the EU for improving the epidemiological surveillance of SARS-CoV-2 [7]. WGS is a more suitable approach than RT-qPCR to track both existing and newly emerging SARS-CoV-2 variants. Wastewater sequencing is currently however mainly used to construct the consensus genome sequence and determine the most prevalent strain in communities, but interest exists in its potential for detecting LFV and consequently determining all circulating variants, in particular VOCs [7].

To evaluate the potential of targeted amplicon-based SARS-CoV-2 WGS to detect and quantify VOCs present at low abundances in mixed samples, we assessed the performance of a workflow designed for LFV detection in WGS data of wastewater samples. Mutations defining lineage B.1.1.7 were employed as a proof-of-concept using an approach based on *in silico* modifying real sequencing data to construct two datasets, mimicking wastewater deep sequencing with the Illumina technology. For the first dataset, lineage B.1.1.7-defining mutations were introduced *in silico* into raw wild-type sequencing datasets. For the second dataset, the same mutations were introduced by mixing wild-type and B.1.1.7 raw sequencing datasets. In Dataset 1, the coverage profile of the samples corresponded to a typical real dataset including large fluctuations in sequencing coverage at certain positions. In Dataset 2, sequencing coverages were normalized, which allowed evaluating with high precision how reliable AF detection is at specific coverages. Afterwards, the ability to both detect and quantify LFV was evaluated. Results demonstrated that WGS enabled detecting LFV with very high performance. As expected, lower coverages and AFs resulted in lower sensitivity and higher variability of estimated AFs. We found, employing the most conservative thresholds from either Datasets 1 or 2, that a sequencing coverage of 250X, 500X, 1500X, and 10,000X is required to detect all LFV at an AF of 10%, 5%, 3% and 1%, respectively (Table 3 and Table 4). For quantification of variants, the variability remained overall small for all conditions respecting the above thresholds, resulting in reliable abundance estimations, despite the variability of estimated AF increasing at lower coverages



475 and AF. Of note, it was observed that the profile of the genome coverage differed at some  
476 positions between wild-type and mutant samples indicating that the amplicon-based  
477 enrichment approach could possibly introduce a bias. Consequently, this should be  
478 considered when examining and quantifying the proportion of mutants in the sample.

479 Obtaining high coverages for wastewater samples may however be challenging under real-  
480 world conditions. In contrast to clinical samples in which viral loads are typically high,  
481 ranging from  $10^4$  to  $10^7$  copies/mL [62], viral RNA loads in wastewater samples are often  
482 low, ranging from  $10^{-1}$  to  $10^{3.5}$  copies/mL [63]. This renders it more challenging to sequence  
483 samples with a low viral load. Additionally, variants circulating at low frequencies in a  
484 community are expected to be present at a low AF in wastewater samples. Nevertheless,  
485 employing the most conservative thresholds from either Datasets 1 or 2, 90% of LFV present  
486 at an AF of 10%, 5%, 3% and 1% were still detected at a sequencing coverage of 100X,  
487 250X, 500X, and 2500X respectively (Table 3 and Table 4). This study focussed on the  
488 sensitivity of LFV detection and did not explore the false positive rates (i.e. specificity).  
489 Although our recommendations for AFs and coverages ensure high sensitivity, often an  
490 inverse relationship exists between sensitivity and specificity and we can therefore not  
491 exclude that false positives occur for AF and coverage combinations considered as providing  
492 qualitative results in this study. A false positive detection is however typically less  
493 problematic compared to a false negative result as the former can still be discovered in  
494 follow-up investigation in contrast to the latter. Additionally, false positive observations  
495 typically occur randomly over the genome [38] and it is unlikely that all VOC-defining  
496 mutations would be simultaneously falsely detected, even at low AFs and coverages. The  
497 issue of low viral load, low expected AF and potential false positives can be mitigated by  
498 sequencing wastewater samples in duplicate when necessary. Possible false positive results  
499 could be investigated using RT-qPCR or RT-ddPCR assays that target that specific  
500 positions.

Our results can serve as a reference for the scientific community to select appropriate thresholds for the AF and coverage. These could also be context-specific as a smaller or larger degree of false negatives might be warranted for specific applications, and can also be used as a baseline for determining the number of samples that can be multiplexed per run to optimize cost-efficiency of WGS. Our findings highlight the feasibility of using targeted amplicon-based metagenomics approaches for wastewater surveillance, as such samples comprise a collection of different strains, among which the dominant strain will define the consensus sequence of the sample and the detected LFV will represent the circulating strains present at lower frequencies. Other studies that investigated LFV in wastewater provided limited quality criteria regarding the coverage and AF. Furthermore, the quality criteria in these studies were not evaluated using a defined population [33, 34]. ECDC has provided limited quality criteria regarding the sequencing coverage, namely 500X across 95% of the genome to detect LFV, but has not indicated the corresponding AF thresholds this corresponds to for reliable LFV detection [31]. Based on the results obtained in this study, a coverage of 500X allowed to detect LFV until an AF of 5% with perfect sensitivity and would therefore be less suited to detect LFV at lower AFs. Lythgoe et al. recommended a depth of at least 100 reads with an AF of at least 3% to detect the LFV in clinical samples with high viral loads (50,000 uniquely mapped reads) [64]. Based on the results in this study, these recommendations appear not sufficiently strict, since we observed that an AF of 3% requires at least a sequencing coverage of 1500X to detect all LFV or 500X to detect 90% of LFV.

In the presence of multiple VOCs, the VOCs can be identified by composing all possible combinations of LFV as a conservative strategy, although multiple VOCs in one sample will also make the estimation of the relative abundance of each VOC more complicated. If multiple VOCs with partially overlapping defining mutations would be present in a wastewaters sample, some mutations of interest would consequently be present at different AFs. Haplotyping reconstruction methods could be used in such situations to delineate VOCs. However, most haplotype reconstruction programmes perform poorly under higher

529 levels of diversity, and haplotype populations with rare haplotypes are often not recovered  
530 [65]. Although haplotype reconstruction has been described for short reads, Nanopore  
531 sequencing might offer a substantial advantage for such cases due to its longer reads,  
532 despite their higher error rate, to perform haplotype estimation to delineate actual VOCs.

533 In conclusion, there exists a pressing need for recommendations for detecting LFV for  
534 wastewater surveillance. Although further work is still required to investigate the specificity  
535 and possibility to detect VOCs instead of just mutations, including for other existing and  
536 employed methodologies such as probe-based capture and/or Nanopore sequencing, this  
537 study demonstrates the feasibility of a targeted metagenomics approach for highly sensitive  
538 LFV detection with acceptable relative abundance estimations using a tiled-amplicon  
539 enrichment based on the Illumina technology. This approach enables the detection of  
540 mutations associated with specific VOCs. Our approach could also be used to evaluate the  
541 potential occurrence of co-infections with other SARS-CoV-2 variants with different strains in  
542 clinical samples. In future work this approach should be evaluated on real wastewater data,  
543 as in this study high-quality data from clinical specimens was used and modified *in silico* to  
544 mimic wastewater data. In light of the pandemic urgency, and the multiple SARS-CoV-2  
545 wastewater surveillance initiatives that are being established and also being integrated into  
546 coordinated overarching coordination and preparedness initiatives such as the recently  
547 announced European Health Emergency Preparedness and Response Authority [7], we  
548 hope that our results will help establishing guidance and recommendations for wastewater  
549 surveillance and other relevant applications.

## 550 **Contributions**

551 Conceptualization: Nancy Roosens, Kevin Vanneste, Xavier Saelens; Project Administration:  
 552 Nancy Roosens; Data Curation: Laura Van Poelvoorde; Methodology: Laura Van  
 553 Poelvoorde, Thomas Delcourt, Wim Coucke, Sigrid De Keersmaecker, Nancy Roosens,  
 554 Kevin Vanneste; Software: Laura Van Poelvoorde, Thomas Delcourt, Wim Coucke; Formal  
 555 Analysis: Laura Van Poelvoorde, Thomas Delcourt, Wim Coucke; Investigation: Laura Van  
 556 Poelvoorde; Visualization: Laura Van Poelvoorde; Validation: Laura Van Poelvoorde,  
 557 Thomas Delcourt; Writing – Original Draft Preparation: Laura Van Poelvoorde, Thomas  
 558 Delcourt, Nancy Roosens, Kevin Vanneste; Writing – Review & Editing: all authors; Funding  
 559 Acquisition: Nancy Roosens, Philippe Herman; Supervision: Nancy Roosens, Kevin  
 560 Vanneste

## 561 **Ethical disclaimer**

562 Not applicable.

## 563 **Conflicts of interest**

564 The authors declare that there are no conflicts of interest.

## 565 **Funding information**

566 This study was financed by Sciensano through COVID-19 special funding.

## 5 References

1. **Kim D, Lee J-Y, Yang J-S, Kim JW, Kim VN, et al.** The Architecture of SARS-CoV-2 Transcriptome. *Cell* 2020;181:914-921.e10.
2. **Leclerc QJ, Fuller NM, Knight LE, Funk S, Knight GM.** What settings have been linked to SARS-CoV-2 transmission clusters? *Wellcome Open Res* 2020;5:83.
3. **Azuma K, Yanagi U, Kagi N, Kim H, Ogata M, et al.** Environmental factors involved in SARS-CoV-2 transmission: effect and role of indoor environmental quality in the strategy for COVID-19 infection control. *Environ Health Prev Med* 2020;25:66.
4. **Contreras S, Dehning J, Loidolt M, Zierenberg J, Spitzner FP, et al.** The challenges of containing SARS-CoV-2 via test-trace-and-isolate. *Nat Commun* 2021;12:378.
5. **Zhang W, Du R-H, Li B, Zheng X-S, Yang X-L, et al.** Molecular and serological investigation of 2019-nCoV infected patients: implication of multiple shedding routes. *Emerg Microbes Infect* 2020;9:386–389.
6. **Wu Y, Guo C, Tang L, Hong Z, Zhou J, et al.** Prolonged presence of SARS-CoV-2 viral RNA in faecal samples. *lancet Gastroenterol Hepatol* 2020;5:434–435.
7. **European Commission.** *Commission Recommendation of 17.3.2021 on a common approach to establish a systematic surveillance of SARS-CoV-2 and its variants in wastewaters in the EU.* [https://ec.europa.eu/environment/pdf/water/recommendation\\_covid19\\_monitoring\\_wastewaters.pdf](https://ec.europa.eu/environment/pdf/water/recommendation_covid19_monitoring_wastewaters.pdf) (2021).
8. **Ahmed W, Angel N, Edson J, Bibby K, Bivins A, et al.** First confirmed detection of SARS-CoV-2 in untreated wastewater in Australia: A proof of concept for the wastewater surveillance of COVID-19 in the community. *Sci Total Environ* 2020;728:138764.

- 592 9. **Medema G, Heijnen L, Elsinga G, Italiaander R, Brouwer A.** Presence of SARS-  
593 Coronavirus-2 RNA in Sewage and Correlation with Reported COVID-19 Prevalence  
594 in the Early Stage of the Epidemic in The Netherlands. *Environ Sci Technol Lett*  
595 2020;7:511–516.
- 596 10. **Wu F, Zhang J, Xiao A, Gu X, Lee WL, et al.** SARS-CoV-2 Titers in Wastewater Are  
597 Higher than Expected from Clinically Confirmed Cases. *mSystems*;5. Epub ahead of  
598 print 21 July 2020. DOI: 10.1128/mSystems.00614-20.
- 599 11. **Thompson JR, Nanchaiah Y V, Gu X, Lee WL, Rajal VB, et al.** Making waves:  
600 Wastewater surveillance of SARS-CoV-2 for population-based health management.  
601 *Water Res* 2020;184:116181.
- 602 12. **Sinclair RG, Choi CY, Riley MR, Gerba CP.** Pathogen Surveillance Through  
603 Monitoring of Sewer Systems. pp. 249–269.
- 604 13. **Xagorarakis I, O'Brien E.** Wastewater-Based Epidemiology for Early Detection of Viral  
605 Outbreaks. In: O'Bannon DJ (editor). Cham: Springer International Publishing. pp. 75–  
606 97.
- 607 14. **Panchal D, Prakash O, Bobde P, Pal S.** SARS-CoV-2: sewage surveillance as an  
608 early warning system and challenges in developing countries. *Environ Sci Pollut Res.*  
609 Epub ahead of print 17 March 2021. DOI: 10.1007/s11356-021-13170-8.
- 610 15. **Duchene S, Featherstone L, Haritopoulou-Sinanidou M, Rambaut A, Lemey P, et**  
611 **al.** Temporal signal and the phylodynamic threshold of SARS-CoV-2. *Virus Evol*  
612 2020;6:1–8.
- 613 16. **Hoffmann M, Arora P, Groß R, Seidel A, Hörnich BF, et al.** SARS-CoV-2 variants  
614 B.1.351 and P.1 escape from neutralizing antibodies. *Cell*. Epub ahead of print March  
615 2021. DOI: 10.1016/j.cell.2021.03.036.
- 616 17. **Davies NG, Abbott S, Barnard RC, Jarvis CI, Kucharski AJ, et al.** Estimated

transmissibility and severity of novel SARS-CoV-2 Variant of Concern 202012/01 in  
England. *medRxiv* 2021;2020.12.24.20248822.

18. **SAGE-EMG, SPI-B, Transmission Group.** Mitigations to Reduce Transmission of the  
new variant SARS-CoV-2 virus.  
[https://assets.publishing.service.gov.uk/government/uploads/system/uploads/attachm  
ent\\_data/file/948607/s0995-mitigations-to-reduce-transmission-of-the-new-variant.pdf](https://assets.publishing.service.gov.uk/government/uploads/system/uploads/attachment_data/file/948607/s0995-mitigations-to-reduce-transmission-of-the-new-variant.pdf)  
(2020, accessed 4 March 2021).

19. **GOV.UK - Scientific Advisory Group for Emergencies.** NERVTAG: Update note on  
B.1.1.7 severity.  
[https://assets.publishing.service.gov.uk/government/uploads/system/uploads/attachm  
ent\\_data/file/961042/S1095\\_NERVTAG\\_update\\_note\\_on\\_B.1.1.7\\_severity\\_2021021  
1.pdf](https://assets.publishing.service.gov.uk/government/uploads/system/uploads/attachment_data/file/961042/S1095_NERVTAG_update_note_on_B.1.1.7_severity_20210211.pdf) (2021, accessed 4 March 2021).

20. **Greaney AJ, Starr TN, Gilchuk P, Zost SJ, Binshtein E, et al.** Complete Mapping of  
Mutations to the SARS-CoV-2 Spike Receptor-Binding Domain that Escape Antibody  
Recognition. *Cell Host Microbe* 2021;29:44-57.e9.

21. **Gómez CE, Perdiguero B, Esteban M.** Emerging SARS-CoV-2 Variants and Impact  
in Global Vaccination Programs against SARS-CoV-2/COVID-19. *Vaccines*  
2021;9:243.

22. **Shao W, Li X, Goraya MU, Wang S, Chen J-LL.** Evolution of Influenza A Virus by  
Mutation and Re-Assortment. *Int J Mol Sci* 2017;18:1650.

23. **Boni MF.** Vaccination and antigenic drift in influenza. *Vaccine* 2008;26:C8–C14.

24. **Bal A, Destras G, Gaymard A, Stefic K, Marlet J, et al.** Two-step strategy for the  
identification of SARS-CoV-2 variant of concern 202012/01 and other variants with  
spike deletion H69–V70, France, August to December 2020. *Eurosurveillance*  
2021;26:1–5.

642 25. **Shu Y, McCauley J.** GISAID: Global initiative on sharing all influenza data – from  
643 vision to reality. *Eurosurveillance* 2017;22:30494.

644 26. **Charre C, Ginevra C, Sabatier M, Regue H, Destras G, et al.** Evaluation of NGS-  
645 based approaches for SARS-CoV-2 whole genome characterisation. *Virus Evol*;6.  
646 Epub ahead of print 1 July 2020. DOI: 10.1093/ve/veaa075.

647 27. **Hartley PD, Tillett RL, AuCoin DP, Sevinsky JR, Xu Y, et al.** Genomic surveillance  
648 of Nevada patients revealed prevalence of unique SARS-CoV-2 variants bearing  
649 mutations in the RdRp gene. *J Genet Genomics*. Epub ahead of print February 2021.  
650 DOI: 10.1016/j.jgg.2021.01.004.

651 28. **Firestone MJ, Lorentz AJ, Meyer S, Wang, X, Como-Sabetti K, et al.** First  
652 Identified Cases of SARS-CoV-2 Variant P.1 in the United States — Minnesota,  
653 January 2021. *MMWR Morb Mortal Wkly Rep* 2021;70:346–347.

654 29. **van Dorp L, Acman M, Richard D, Shaw LP, Ford CE, et al.** Emergence of genomic  
655 diversity and recurrent mutations in SARS-CoV-2. *Infect Genet Evol* 2020;83:104351.

656 30. **Lin J, Tang C, Wei H, Du B, Chen C, et al.** Genomic monitoring of SARS-CoV-2  
657 uncovers an Nsp1 deletion variant that modulates type I interferon response. *Cell*  
658 *Host Microbe* 2021;29:489-502.e8.

659 31. **ECDC.** *Sequencing of SARS-CoV-2: first update (18 January 2021).*  
660 [https://www.ecdc.europa.eu/sites/default/files/documents/Sequencing-of-SARS-CoV-](https://www.ecdc.europa.eu/sites/default/files/documents/Sequencing-of-SARS-CoV-2-first-update.pdf)  
661 [2-first-update.pdf](https://www.ecdc.europa.eu/sites/default/files/documents/Sequencing-of-SARS-CoV-2-first-update.pdf) (2021).

662 32. **Crits-Christoph A, Kantor RS, Olm MR, Whitney ON, Al-Shayeb B, et al.** Genome  
663 Sequencing of Sewage Detects Regionally Prevalent SARS-CoV-2 Variants. *MBio*;12.  
664 Epub ahead of print 19 January 2021. DOI: 10.1128/mBio.02703-20.

665 33. **Jahn K, Dreifuss D, Topolsky I, Kull A, Ganesanandamoorthy P, et al.** Detection  
666 of SARS-CoV-2 variants in Switzerland by genomic analysis of wastewater samples.



667 *medRxiv* 2021;2021.01.08.21249379.

668 34. **Izquierdo-Lara R, Elsinga G, Heijnen L, Oude Munnink BB, Schapendonk CME,**  
669 **et al.** Monitoring SARS-CoV-2 circulation and diversity through community  
670 wastewater sequencing. *medRxiv* 2020;2020.09.21.20198838.

671 35. **Isakov O, Bordería A V., Golan D, Hamenahem A, Celniker G, et al.** Deep  
672 sequencing analysis of viral infection and evolution allows rapid and detailed  
673 characterization of viral mutant spectrum. *Bioinformatics* 2015;31:2141–2150.

674 36. **Wilm A, Aw PPK, Bertrand D, Yeo GHT, Ong SH, et al.** LoFreq: a sequence-quality  
675 aware, ultra-sensitive variant caller for uncovering cell-population heterogeneity from  
676 high-throughput sequencing datasets. *Nucleic Acids Res* 2012;40:11189–11201.

677 37. **Macalalad AR, Zody MC, Charlebois P, Lennon NJ, Newman RM, et al.** Highly  
678 Sensitive and Specific Detection of Rare Variants in Mixed Viral Populations from  
679 Massively Parallel Sequence Data. *PLoS Comput Biol* 2012;8:e1002417.

680 38. **Mccrone JT, Lauring S.** Measurements of Intrahost Viral Diversity Are Extremely  
681 Sensitive to Systematic Errors in Variant Calling. *J Virol* 2016;90:6884–6895.

682 39. **Kundu S, Lockwood J, Depledge DP, Chaudhry Y, Aston A, et al.** Next-  
683 Generation Whole Genome Sequencing Identifies the Direction of Norovirus  
684 Transmission in Linked Patients. *Clin Infect Dis* 2013;57:407–414.

685 40. **Simon B, Pichon M, Valette M, Burfin G, Richard M, et al.** Whole Genome  
686 Sequencing of A(H3N2) Influenza Viruses Reveals Variants Associated with Severity  
687 during the 2016–2017 Season. *Viruses* 2019;11:108.

688 41. **Rogers MB, Song T, Sebra R, Greenbaum BD, Hamelin M-E, et al.** Intrahost  
689 dynamics of antiviral resistance in influenza A virus reflect complex patterns of  
690 segment linkage, reassortment, and natural selection. *MBio*;6. Epub ahead of print 7  
691 April 2015. DOI: 10.1128/mBio.02464-14.

692 42. **Leinonen R, Sugawara H, Shumway M.** The Sequence Read Archive. *Nucleic Acids*  
693 *Res* 2011;39:D19–D21.

694 43. **Bushnell B.** BBMap. <https://sourceforge.net/projects/bbmap/> (accessed 29 March  
695 2021).

696 44. **Mölder F, Jablonski KP, Letcher B, Hall MB, Tomkins-Tinch CH, et al.**  
697 Sustainable data analysis with Snakemake. *F1000Research* 2021;10:33.

698 45. **Bolger AM, Lohse M, Usadel B.** Trimmomatic: a flexible trimmer for Illumina  
699 sequence data. *Bioinformatics* 2014;30:2114–2120.

700 46. **Langmead B, Salzberg SL.** Fast gapped-read alignment with Bowtie 2. *Nat Methods*  
701 2012;9:357–9.

702 47. **Danecek P, Bonfield JK, Liddle J, Marshall J, Ohan V, et al.** Twelve years of  
703 SAMtools and BCFtools. *Gigascience*;10. Epub ahead of print 16 February 2021.  
704 DOI: 10.1093/gigascience/giab008.

705 48. **Rambaut A, Loman N, Pybus O, Barclay W, Barrett J, et al.** *Preliminary genomic*  
706 *characterisation of an emergent SARS-CoV-2 lineage in the UK defined by a novel*  
707 *set of spike mutations.* [https://virological.org/t/preliminary-genomic-characterisation-](https://virological.org/t/preliminary-genomic-characterisation-of-an-emergent-sars-cov-2-lineage-in-the-uk-defined-by-a-novel-set-of-spike-mutations/563)  
708 [of-an-emergent-sars-cov-2-lineage-in-the-uk-defined-by-a-novel-set-of-spike-](https://virological.org/t/preliminary-genomic-characterisation-of-an-emergent-sars-cov-2-lineage-in-the-uk-defined-by-a-novel-set-of-spike-mutations/563)  
709 [mutations/563](https://virological.org/t/preliminary-genomic-characterisation-of-an-emergent-sars-cov-2-lineage-in-the-uk-defined-by-a-novel-set-of-spike-mutations/563) (2020).

710 49. **Public Health England.** Variants of concern or under investigation.  
711 [https://www.gov.uk/government/publications/covid-19-variants-genomically-confirmed-](https://www.gov.uk/government/publications/covid-19-variants-genomically-confirmed-case-numbers/variants-distribution-of-cases-data)  
712 [case-numbers/variants-distribution-of-cases-data](https://www.gov.uk/government/publications/covid-19-variants-genomically-confirmed-case-numbers/variants-distribution-of-cases-data) (2021, accessed 4 March 2021).

713 50. **Centers for Disease Control and Prevention (CDC).** SARS-CoV-2 Variants.  
714 [https://www.cdc.gov/coronavirus/2019-ncov/cases-updates/variant-](https://www.cdc.gov/coronavirus/2019-ncov/cases-updates/variant-surveillance/variant-info.html)  
715 [surveillance/variant-info.html](https://www.cdc.gov/coronavirus/2019-ncov/cases-updates/variant-surveillance/variant-info.html) (2021, accessed 4 March 2021).

716 51. **WHO.** Tracking SARS-CoV-2 variants. <https://www.who.int/en/activities/tracking->

717 SARS-CoV-2-variants/ (2021, accessed 23 June 2021).

718 52. **Reichmuth M, Hodcroft E, Riou J, Althaus CL, Schibler M, et al.** Transmission of  
719 SARS-CoV-2 variants in Switzerland. <https://ispmbern.github.io/covid-19/variants/>  
720 (2021, accessed 4 March 2021).

721 53. **Rambaut A, Loman N, Pybus O, Barcly W, Barrett J, et al.** Preliminary genomic  
722 characterisation of an emergent SARS-CoV-2 lineage in the UK defined by a novel  
723 set of spike mutations. [https://virological.org/t/preliminary-genomic-characterisation-](https://virological.org/t/preliminary-genomic-characterisation-of-an-emergent-sars-cov-2-lineage-in-the-uk-defined-by-a-novel-set-of-spike-mutations/563)  
724 [of-an-emergent-sars-cov-2-lineage-in-the-uk-defined-by-a-novel-set-of-spike-](https://virological.org/t/preliminary-genomic-characterisation-of-an-emergent-sars-cov-2-lineage-in-the-uk-defined-by-a-novel-set-of-spike-mutations/563)  
725 [mutations/563](https://virological.org/t/preliminary-genomic-characterisation-of-an-emergent-sars-cov-2-lineage-in-the-uk-defined-by-a-novel-set-of-spike-mutations/563) (2021, accessed 4 March 2021).

726 54. **Li H, Handsaker B, Wysoker A, Fennell T, Ruan J, et al.** The Sequence  
727 Alignment/Map format and SAMtools. *Bioinformatics* 2009;25:2078–2079.

728 55. **Harris CR, Millman KJ, van der Walt SJ, Gommers R, Virtanen P, et al.** Array  
729 programming with NumPy. *Nature* 2020;585:357–362.

730 56. **Broad Institute.** Picard. <http://broadinstitute.github.io/picard/> (accessed 26 March  
731 2021).

732 57. **McKenna A, Hanna M, Banks E, Sivachenko A, Cibulskis K, et al.** The Genome  
733 Analysis Toolkit: A MapReduce framework for analyzing next-generation DNA  
734 sequencing data. *Genome Res* 2010;20:1297–1303.

735 58. **Lindenbaum P.** Jvarkit: java-based utilities for Bioinformatics.

736 59. **Ewing AD, Houlahan KE, Hu Y, Ellrott K, Caloian C, et al.** Combining tumor  
737 genome simulation with crowdsourcing to benchmark somatic single-nucleotide-  
738 variant detection. *Nat Methods* 2015;12:623–630.

739 60. **Quinlan AR, Hall IM.** BEDTools: a flexible suite of utilities for comparing genomic  
740 features. *Bioinformatics* 2010;26:841–842.

741 61. **Sievert C.** Interactive Web-Based Data Visualization with R, plotly, and shiny.

742 <https://plotly-r.com> (2020).

743 62. **Pan Y, Zhang D, Yang P, Poon LLM, Wang Q.** Viral load of SARS-CoV-2 in clinical  
744 samples. *Lancet Infect Dis* 2020;20:411–412.

745 63. **Saawarn B, Hait S.** Occurrence, fate and removal of SARS-CoV-2 in wastewater:  
746 Current knowledge and future perspectives. *J Environ Chem Eng* 2021;9:104870.

747 64. **Lythgoe KA, Hall M, Ferretti L, de Cesare M, MacIntyre-Cockett G, et al.** SARS-  
748 CoV-2 within-host diversity and transmission. *Science (80- )* 2021;372:eabg0821.

749 65. **Eliseev A, Gibson KM, Avdeyev P, Novik D, Bendall ML, et al.** Evaluation of  
750 haplotype callers for next-generation sequencing of viruses. *Infect Genet Evol*  
751 2020;82:104277.

752
