# Supplementary material for: Strategy and performance evaluation of low-frequency variant calling for SARS-CoV-2 in wastewater using targeted deep Illumina sequencing
Source: bioRxiv or medRxiv preprint supplement (doi:10.1101/2021.07.02.21259923), 2021-07-07
Supplement: Supplementary file [file media-2.pdf]

## Supplementary files

**Supplementary File S1: List of initial 316 samples for which a consensus sequence was generated**

**Supplementary File S2: Scripts for LFV workflow**

### Lofreq Workflow.smk

```
from pathlib import Path
import os
root = Path('Path/To/Samples')

all_samples = [fq.name.split('_')[0] for fq in root.iterdir() if '_R1_001.fastq.gz'
in fq.name]

print(all_samples)

snake_dir = workflow.basedir

rule all:
    input:
        CSV = expand(str(root / '{sample}' / 'lofreq' / '{sample}_nofilter.csv'),
sample=all_samples),

rule trim_reads:
    """
    Trims paired end reads using trimmomatic.
    """
    input:
        FQ_fwd = lambda wildcards: str(root /
f'{wildcards.sample}_R1_001.fastq.gz'),
        FQ_rev = lambda wildcards: str(root /
f'{wildcards.sample}_R2_001.fastq.gz'),
    output:
        FQ_1P = temporary(root / '{sample}' / 'trimming' /
'trimmed_reads_1P.fastq'),
        FQ_2P = temporary(root / '{sample}' / 'trimming' /
'trimmed_reads_2P.fastq'),
        FQ_1U = temporary(root / '{sample}' / 'trimming' /
'trimmed_reads_1U.fastq'),
        FQ_2U = temporary(root / '{sample}' / 'trimming' /
'trimmed_reads_2U.fastq'),
    params:
        basename_output = lambda wildcards: root / wildcards.sample / 'trimming' /
'trimmed_reads.fastq',
        min_len = 40
    threads: 4
    shell:
        """
        module load trimmomatic/0.38;
        cd {params.basename_output.parent}; # Directory is changed because multiple
trimmomatic runs in the same directory interfere with each other
        trimmomatic.sh PE -baseout {params.basename_output} -threads {threads}
{input.FQ_fwd} {input.FQ_rev} \
        ILLUMINACLIP:$TRIMMOMATIC_ADAPTER_DIR/NexteraPE-PE.fa:2:30:10 LEADING:10
TRAILING:10 SLIDINGWINDOW:4:20 \
        MINLEN:{params.min_len}
        """
```

```

rule consensus_fasta_index:
  input:
    FASTA = lambda wildcards: str(root / f"{wildcards.sample.split('-')[0]}.fasta")
  output:
    INDEX = root / '{sample}' / 'lofreq' / 'reference' / '{sample}.fasta'
  shell:
    """
    module load samtools/1.9;
    module load bowtie2/2.3.4.3;
    cp {input.FASTA} {output.INDEX};
    samtools faidx {output.INDEX};
    bowtie2-build {output.INDEX} {output.INDEX};
    """

rule bt2_map_reads:
  input:
    FASTA = rules.consensus_fasta_index.output.INDEX,
    FQ_1P = rules.trim_reads.output.FQ_1P,
    FQ_2P = rules.trim_reads.output.FQ_2P,
    FQ_1U = rules.trim_reads.output.FQ_1U,
    FQ_2U = rules.trim_reads.output.FQ_2U
  output:
    SAM = temporary(root / '{sample}' / 'lofreq' / '{sample}.sam')
  threads: 16
  shell:
    """
    module load bowtie2/2.3.4.3;
    bowtie2 -x {input.FASTA} -1 {input.FQ_1P} -2 {input.FQ_2P} -S {output.SAM}
    -p {threads};
    """

rule sam_to_bam:
  input:
    SAM = rules.bt2_map_reads.output.SAM
  output:
    BAM = temporary(root / '{sample}' / 'lofreq' / '{sample}.bam')
  shell:
    """
    module load samtools/1.9;
    samtools view -S -b {input.SAM} > {output.BAM};
    """

rule sort_bam:
  input:
    BAM = rules.sam_to_bam.output.BAM
  output:
    SORT_BAM = temporary(root / '{sample}' / 'lofreq' / '{sample}_sort.bam'),
    SORT_BAM_index = root / '{sample}' / 'lofreq' / '{sample}_sort.bam.bai'
  shell:
    """
    module load samtools/1.9;
    samtools sort -o {output.SORT_BAM} --output-fmt bam --threads 8
    {input.BAM}
    samtools index {output.SORT_BAM};
    """

rule samtools_depth:
  input:
    SORTBAM = rules.sort_bam.output.SORT_BAM

```

```

output:
  DEPTH = temporary(root / '{sample}' / 'lofreq' / '{sample}_Depth.txt')
shell:
  """
  module load samtools/1.9;
  samtools depth -d 1000000 {input.SORTBAM} -aa | awk '{{print $1, $3}}' >
{output.DEPTH}
  """

rule median_average_depth:
  input:
    DEPTH = {rules.samtools_depth.output.DEPTH}
  output:
    AV_DEPTH = root / '{sample}' / 'lofreq' /
'{sample}_Depth_AverageCoverage.txt',
    MED_DEPTH = root / '{sample}' / 'lofreq' /
'{sample}_Depth_MedianCoverage.txt'
  params:
    base = lambda wildcards: wildcards.sample
  shell:
    """
    sort -V {input.DEPTH} | awk '{{a[i++]=$2; }} END {{print "{params.base}"
";" a[int(i/2)]; }}' > {output.MED_DEPTH}
    sort -V {input.DEPTH} | awk '{{total += $2 }} END {{print "{params.base}"
";" total/NR; }}' > {output.AV_DEPTH}
    """

rule bam_read_count:
  input:
    MED_DEPTH = rules.median_average_depth.output.MED_DEPTH,
    SORTBAM = rules.sort_bam.output.SORT_BAM,
    FASTA = rules.consensus_fasta_index.output.INDEX,
  output:
    TXT = root / '{sample}' / 'lofreq' / '{sample}_bamreadcount.txt'
  params:
    script = 'bam-readcount/bin/bam-readcount',
  resources:
    mem_mb=80000
  shell:
    """
    var=$(grep -e "^>" {input.FASTA} | awk 'sub(/^>/, "")')
    {params.script} -f {input.FASTA} {input.SORTBAM} -w 1 -d 1000000 $var:1-
29861 > {output.TXT}
    """

rule create_seq_dict:
  input:
    TXT = rules.bam_read_count.output.TXT,
    FASTA = rules.consensus_fasta_index.output.INDEX,
  output:
    DICT = root / '{sample}' / 'lofreq' / 'reference' / '{sample}.dict'
  shell:
    """
    module load picard/2.18.14;
    run_picard.sh CreateSequenceDictionary REFERENCE={input.FASTA}
OUTPUT={output.DICT} ;
    """

rule sort_sam_picard:
  input:
    BAMREADCOUNT = {rules.bam_read_count.output.TXT},
    BAM = rules.sam_to_bam.output.BAM,

```

```

    DICT = rules.create_seq_dict.output.DICT
output:
    SortBAM = temporary(root / '{sample}' / 'lofreq' /
'{sample}_picardSorted.bam')
    shell:
        """
        module load picard/2.18.14;
        run_picard.sh SortSam I={input.BAM} O={output.SortBAM}
SORT_ORDER=coordinate
        """

rule index_picardSorted_bam:
input:
    Dedup_BAM = rules.sort_sam_picard.output.SortBAM
output:
    index_Dedup_BAM = root / '{sample}' / 'lofreq' /
'{sample}_picardSorted.bam.bai',
    shell:
        """
        module load samtools/1.9;
        samtools index {input.Dedup_BAM}
        """

rule read_groups:
input:
    Dedup_BAM = rules.sort_sam_picard.output.SortBAM,
    index_Dedup_BAM = rules.index_picardSorted_bam.output.index_Dedup_BAM
output:
    gp_BAM = temporary(root / '{sample}' / 'lofreq' / '{sample}_gp.bam'),
    shell:
        """
        module load picard/2.18.14;
        run_picard.sh AddOrReplaceReadGroups I={input.Dedup_BAM} O={output.gp_BAM}
LB=test PL=test PU=test SM=test
        """

rule index_gp_bam:
input:
    GP_BAM = rules.read_groups.output.gp_BAM
output:
    index_gp_BAM = root / '{sample}' / 'lofreq' / '{sample}_gp.bam.bai',
    shell:
        """
        module load samtools/1.9;
        samtools index {input.GP_BAM}
        """

rule realigner_targetcreator:
input:
    FASTA = rules.consensus_fasta_index.output.INDEX,
    GP_BAM = rules.read_groups.output.gp_BAM,
    index_Dedup_BAM = rules.index_gp_bam.output.index_gp_BAM,
    DICT = rules.create_seq_dict.output.DICT
output:
    INTERVAL = root / '{sample}' / 'lofreq' / '{sample}.intervals',
    shell:
        """
        module load gatk/3.7;
        run_gatk.sh -T RealignerTargetCreator -R {input.FASTA} -I {input.GP_BAM} -
o {output.INTERVAL};
        """

```

```

    """

rule indel_realigner:
    input:
        FASTA = rules.consensus_fasta_index.output.INDEX,
        GP_BAM = rules.read_groups.output.gp_BAM,
        INTERVAL = rules.realigner_targetcreator.output.INTERVAL
    output:
        REAL_BAM = temporary(root / '{sample}' / 'lofreq' / '{sample}_real.bam'),
    shell:
        """
        module load gatk/3.7;
        run_gatk.sh -T IndelRealigner -maxReads 1000000 -R {input.FASTA} -I
        {input.GP_BAM} -targetIntervals {input.INTERVAL} -o {output.REAL_BAM};
        """

rule index_real_bam:
    input:
        REAL_BAM = rules.indel_realigner.output.REAL_BAM
    output:
        index_real_BAM = root / '{sample}' / 'lofreq' / '{sample}_real.bam.bai',
    shell:
        """
        module load samtools/1.9;
        samtools index {input.REAL_BAM}
        """

rule lofreq_indelqual:
    input:
        FASTA = rules.consensus_fasta_index.output.INDEX,
        REAL_BAM = rules.indel_realigner.output.REAL_BAM,
        INTERVAL = rules.realigner_targetcreator.output.INTERVAL,
        INDEX = rules.index_real_bam.output.index_real_BAM
    output:
        INDELQUAL_BAM = temporary(root / '{sample}' / 'lofreq' /
        '{sample}_indelqual.bam'),
    shell:
        """
        module load lofreq_star/2.1.3.1;
        lofreq indelqual --dindel -f {input.FASTA} -o {output.INDELQUAL_BAM}
        {input.REAL_BAM}
        """

rule lofreq_indelqual_index:
    input:
        indelqual_BAM = rules.lofreq_indelqual.output.INDELQUAL_BAM
    output:
        index_indelqual_BAM = root / '{sample}' / 'lofreq' /
        '{sample}_indelqual.bam.bai',
    shell:
        """
        module load samtools/1.9;
        samtools index {input.indelqual_BAM}
        """

rule lofreq_call:
    input:
        FASTA = rules.consensus_fasta_index.output.INDEX,
        INDELQUAL_BAM = rules.lofreq_indelqual.output.INDELQUAL_BAM,
        index_INDELQUAL_BAM =
rules.lofreq_indelqual_index.output.index_indelqual_BAM

```

```

output:
    LOFREQ_VCF = root / '{sample}' / 'lofreq' / '{sample}_unfiltered.vcf',
shell:
    """
    module load lofreq_star/2.1.3.1;
    lofreq call --call-indels --no-default-filter -f {input.FASTA} -o
{output.LOFREQ_VCF} {input.INDELQUAL_BAM}
    """

rule lofreq_filter:
input:
    LOFREQ_VCF = rules.lofreq_call.output.LOFREQ_VCF
output:
    LOFREQ_VCF_2 = root / '{sample}' / 'lofreq' / '{sample}_filtered.vcf',
shell:
    """
    module load lofreq_star/2.1.3.1;
    lofreq filter -i {input.LOFREQ_VCF} -o {output.LOFREQ_VCF_2} --sb-thresh
2147483647
    """

rule add_info_to_vcf:
input:
    REAL_BAM = rules.indel_realigner.output.REAL_BAM,
    LOFREQ_VCF_2 = rules.lofreq_filter.output.LOFREQ_VCF_2
output:
    POS_Q_VCF_2 = root / '{sample}' / 'lofreq' / '{sample}_pos_q.vcf'
params:
    script = os.path.join(snake_dir, "../python/scripts/add_info_to_vcf.py")
shell:
    """
    python {params.script} {input.REAL_BAM} {input.LOFREQ_VCF_2}
{output.POS_Q_VCF_2}
    """

rule vcf_to_csv:
input:
    POS_Q_VCF_2 = rules.add_info_to_vcf.output.POS_Q_VCF_2
output:
    CSV_nF_2 = root / '{sample}' / 'lofreq' / '{sample}_nofilter.csv'
params:
    script = os.path.join(snake_dir, "../python/scripts/vcf_to_csv_lofreq.py"),
    base = lambda wildcards: wildcards.sample
shell:
    """
    python {params.script} -I {input.POS_Q_VCF_2} -O {output.CSV_nF_2} -S
{params.base} -F none
    """

```

# 1 add\_info\_to\_vcf.py

```
# modified from lauringlab (cf
https://github.com/lauringlab/Benchmarking\_paper/blob/master/scripts/mapq\_vcf.py)
#!/usr/bin/python

import numpy as np
import pysam
import os
import vcf
from vcf.parser import _Info as VcfInfo
import sys

def filter(bam_file=None, in_vcf_file=None, out_vcf_file=None):
    """
    Doesn't filter, per say.
    Adds average phred scores, read positions and MapQ.
    :param bam_file:
    :param in_vcf_file:
    :param out_vcf_file:
    :return:
    """

    # Not useful, it seems.
    # input = in_vcf_file
    # if "/" in input:
    #     input = input.split("/")[-1]
    #
    # input=input.split(".")[0]

    in_var = vcf.Reader(open(in_vcf_file, 'r'))
    ## update infos ##
    in_var.infos['MapQ']=VcfInfo(id='MapQ',num=1,type='Float',desc="The average
MapQ of the reads containing the called variant", source=None, version=None)
    in_var.infos['Read_pos']=VcfInfo(id='Read_pos',num=1,type='Float',desc="The
average read cycle that called the given variant", source=None, version=None)
    in_var.infos['Phred']=VcfInfo(id='Phred',num=1,type='Float',desc="The average
Phred score of the called variant", source=None, version=None)

    variants=list(in_var)
    if len(variants) != 0:
        with pysam.AlignmentFile(bam_file, "rb") as bamfile:

            for record in variants:
                # TD for debugging
                print(record)
                print(record.POS)
                if record.POS == "1026":
                    pass
                mapq=[] # This will hold a list of the mapping qualities that map
to the variant
                phred=[] # This will hold a list of the phred that map to the
variant
                Read_pos = [] # This will hold a list of position relative to the
read

                chr=record.CHROM
                pos=int(record.POS)
                py_pos=pos-1
```

```

        var=record.ALT[0]
        # record.ID=input
        #stepper="nofilter", min base quality=0, doesn't change anything
on 1 dataset tested
        for pileupcolumn in
bamfile.pileup(chr,py_pos,py_pos+1,truncate=True,stepper="all", max_depth=1E6):
            if pileupcolumn.pos==py_pos:
                for pileupread in pileupcolumn.pileups:
                    if not pileupread.is_del and not pileupread.is_refskip:
called_base=pileupread.alignment.query_sequence[pileupread.query_position]
called_phred=pileupread.alignment.query_qualities[pileupread.query_position]
                    if called_phred>0 and called_base==var: # change
this if you change the phred cut off in deepSNV
mapq.append(pileupread.alignment.mapping_quality)
                        phred.append(called_phred)
                        Read_pos.append(pileupread.query_position)
mean_map=np.mean(mapq)
mean_phred=np.mean(phred)
mean_Read_pos=np.mean(Read_pos)

                if mean_map==[]:
                    print( "OOPS didn't find the variant looks like you didn't fix
the bug")

                        sys.exit(1)

                record.add_info('MapQ',mean_map)
                record.add_info('Read_pos',mean_Read_pos)
                record.add_info('Phred',mean_phred)

        print ("done updating")
        iter(variants)
        vcf_writer = vcf.Writer(open(out_vcf_file, 'w'), in_var)
        for record in variants:
            vcf_writer.write_record(record)
        vcf_writer.close()

    else:
        print("No var provided")

def main():
    args = sys.argv[:]
    if len(args) != 4:
        sys.exit("Not all required arguments were present. Exiting.")

    bam_file = args[1]
    in_vcf_file = args[2]
    out_vcf_file = args[3]

    if not os.path.isfile(out_vcf_file):
        if not os.path.isdir(os.path.split(out_vcf_file)[0]):
            os.mkdir(os.path.split(out_vcf_file)[0])
        # print(sample)
        # print(in_vcf_file)
        filter(bam_file, in_vcf_file, out_vcf_file)

if __name__ == main():
    main()

```



## 2 vcf\_to\_csv\_lofreq.py

```
import csv
import os
import vcf
import sys
import traceback
import argparse

def parse_cla():

    ap = argparse.ArgumentParser()
    ap.add_argument('-O', '--output_csv_path', dest='out_csv_file',
metavar='out_csv_file', required=True, help="Absolute path to output csv file.")
    ap.add_argument('-I', '--in_vcf_path', dest='in_vcf_path',
metavar='in_vcf_path', required=True, help="Absolute path to input vcf file")
    ap.add_argument('-S', '--sample_name', dest='sample_name',
metavar='sample_name', required=True, help="Sample name to be added to each variant
line. Default sampleX", default="sampleX")
    ap.add_argument('-F', '--filter', dest='filter', metavar="filter",
choices=["none", "position", "AF"], help="Filtering to perform; either none (all
variants added to csv), position (only variants within specified average reads
positions are kept), or AF (NOT IMPLEMENTED - filters out based on AF of variant)",
required = True)
    ap.add_argument('-mirp', '--min_read_pos', dest='min_read_pos',
metavar='min_read_pos', required=False, help="Minimal average read position for
filtering on read positions. Required if using --filter position . Default 62.",
default=62)
    ap.add_argument('-marp', '--max_read_pos', dest='max_read_pos',
metavar='max_read_pos', required=False,
help="Max average read position for filtering on read
positions. Required if using --filter position . Default 188.",
default=188)
    return ap.parse_args()

def validate_args(args=None):
    """
    Check that all provided arguments are correct and coherent, expected files
    exist, ....
    :param args:
    :return:
    """
    validated = True

    if args is None:
        print("No args.")
        validated = False
    else:
        if not os.path.isfile(args.in_vcf_path):
            print(f"No vcf file for {args.in_vcf_path}.")
            validated = False

        if args.filter == "AF":
            print(f"filter_high_fq not implemented yet")
            validated = False

    if not validated:
        print(f"Exiting.")
```

```

    sys.exit(1)

def print_pre_run_info(args=None):
    """
    Print warnings and info before running based on args.
    :return:
    """
    print(f"Running with min_read_pos={args.min_read_pos} and max_read_pos =
{args.max_read_pos}.")

def filter_vcf_file(min_read_pos=None, max_read_pos=None, in_vcf_file_path=None,
filter=None):
    """
    Filter the records in vcf file and output the kept records as a list.
    :return: list
    """
    results = []

    with open(in_vcf_file_path, 'r') as in_vcf_file_stream:
        vcf_reader = vcf.Reader(in_vcf_file_stream)
        for record in vcf_reader:
            output_record = [record.CHROM, record.POS, record.REF, record.ALT,
record.INFO["AF"], record.INFO["DP"], record.INFO["SB"]]
            add_record_to_output = False
            try:

                if filter == "none":
                    add_record_to_output = True

                # filter-out extreme average read positions
                elif filter == "position":
                    if min_read_pos < record.INFO['Read_pos'] < max_read_pos:
                        add_record_to_output = True

                # filter on AF values
                elif filter == "AF":
                    pass

            if add_record_to_output:
                results.append(output_record)

        except:
            print("Error with the following variant:")
            print(output_record)
            print(traceback.format_exc())

    return results

def write_csv(output_csv_path=None, results=None, sample_name=None):
    """
    Write csv file with output records.
    :return:
    """

    out_header = ["Sample", "CHROM", "POS", "REF", "ALT", "VF", "DP", "SB"]

    with open(output_csv_path, "w") as out_csv_stream:
        csv_writer = csv.writer(out_csv_stream)
        csv_writer.writerow(out_header)

```

```
        for record in results:
            line = [sample_name]
            for elem in record:
                line.append(elem)
            csv_writer.writerow(line)

def main():

    args = parse_cla()

    validate_args(args=args)
    print_pre_run_info(args=args)

    in_vcf_file_path = args.in_vcf_path
    output_csv_path = args.out_csv_file
    sample_name = args.sample_name

    filter = args.filter
    min_read_pos = args.min_read_pos
    max_read_pos = args.max_read_pos

    results = filter_vcf_file(min_read_pos=min_read_pos, max_read_pos=max_read_pos,
in_vcf_file_path=in_vcf_file_path, filter=filter)

    write_csv(output_csv_path=output_csv_path, results=results,
sample_name=sample_name)

main()
```

**Supplementary Table S1: Coverages of the positions characteristic to B.1.1.7 mutations per sample after normalization.** The cells are coloured according to their group, either with a coverage of approximately 5000X (yellow) or approximately 10,000X (green)

|                             | Mutant     |            |            |            |            |            |            |            |            |            | Wild-type  |            |            |            |            |            |            |            |            |            |
|-----------------------------|------------|------------|------------|------------|------------|------------|------------|------------|------------|------------|------------|------------|------------|------------|------------|------------|------------|------------|------------|------------|
|                             | ERR5059072 | ERR5059238 | ERR5059260 | ERR5059092 | ERR5059204 | ERR5059123 | ERR5059282 | ERR5058968 | ERR5059226 | ERR5059033 | ERR5059114 | ERR5059253 | ERR5059286 | ERR5059283 | ERR5039162 | ERR5059083 | ERR5059133 | ERR5059257 | ERR5059154 | ERR5040499 |
| <b>C913T</b>                | 4917       | 4881       | 4845       | 4780       | 4856       | 4837       | 4813       | 4921       | 4850       | 4745       | 4835       | 4862       | 4839       | 4864       | 4929       | 4926       | 4910       | 4828       | 4880       | 4884       |
| <b>C3267T</b>               | 4849       | 4779       | 4839       | 4814       | 4853       | 4919       | 4864       | 4883       | 4816       | 4870       | 4886       | 4891       | 4786       | 4909       | 4781       | 4896       | 4859       | 4863       | 4839       | 4793       |
| <b>C5388A</b>               | 4790       | 4809       | 4768       | 4767       | 4886       | 4869       | 4862       | 4803       | 4767       | 4727       | 4867       | 4784       | 4798       | 4902       | 4821       | 4862       | 4861       | 4716       | 4811       | 3580       |
| <b>C5986T</b>               | 4783       | 4863       | 4878       | 4788       | 4921       | 4940       | 4883       | 4778       | 4872       | 4769       | 4841       | 4904       | 4885       | 4869       | 4907       | 4905       | 4908       | 4847       | 4912       | 4807       |
| <b>T6954C</b>               | 4793       | 4868       | 4846       | 4746       | 4850       | 4800       | 4839       | 4823       | 4874       | 4724       | 4821       | 4925       | 4849       | 4828       | 4912       | 4856       | 4835       | 4844       | 4872       | 4563       |
| <b>11288-11296 deletion</b> | 5015       | 4980       | 4962       | 4904       | 5007       | 4972       | 5034       | 4879       | 4965       | 4944       | 5009       | 4936       | 4992       | 5001       | 5008       | 5040       | 4962       | 4988       | 4973       | 4858       |
| <b>C14676T</b>              | 4813       | 4825       | 4764       | 4715       | 4834       | 4794       | 4734       | 4861       | 4828       | 4633       | 4780       | 4836       | 4821       | 4763       | 4804       | 4848       | 4870       | 4835       | 4828       | 4731       |
| <b>C15279T</b>              | 4787       | 4770       | 4777       | 4722       | 4807       | 4831       | 4798       | 4815       | 4798       | 4722       | 4877       | 4789       | 4790       | 4765       | 4855       | 4800       | 4795       | 4797       | 4807       | 4796       |
| <b>T16176C</b>              | 9712       | 9883       | 9900       | 9489       | 9734       | 9796       | 9783       | 9738       | 9871       | 9627       | 8998       | 9892       | 9855       | 9855       | 9695       | 9817       | 9722       | 9806       | 9898       | 9543       |
| <b>21765-21770 deletion</b> | 4846       | 4816       | 4894       | 4729       | 4835       | 4833       | 4795       | 4797       | 4845       | 4688       | 4882       | 4906       | 4803       | 4794       | 4799       | 4841       | 4813       | 4769       | 4882       | 4718       |
| <b>21991-21993 deletion</b> | 9718       | 9778       | 9759       | 9552       | 9728       | 9753       | 9766       | 9748       | 9703       | 9494       | 9823       | 9827       | 9774       | 9827       | 9796       | 9723       | 9773       | 9741       | 9850       | 9636       |
| <b>A23063T</b>              | 4459       | 4912       | 5049       | 4862       | 4839       | 4852       | 4899       | 4886       | 4896       | 4571       | 4916       | 4915       | 4867       | 4928       | 4872       | 4378       | 4458       | 4923       | 4883       | 4759       |
| <b>C23271A</b>              | 4730       | 4835       | 4713       | 4636       | 4735       | 4823       | 4859       | 4782       | 4772       | 4694       | 4786       | 4830       | 4811       | 4889       | 4776       | 4825       | 4840       | 4796       | 4755       | 4644       |
| <b>C23604A</b>              | 4807       | 4869       | 4878       | 4766       | 4913       | 4824       | 4822       | 4826       | 4900       | 4710       | 4843       | 4803       | 4860       | 4842       | 4768       | 4868       | 4813       | 4796       | 4932       | 4761       |
| <b>C23709T</b>              | 4882       | 4904       | 4907       | 4901       | 4952       | 4846       | 4853       | 4852       | 4929       | 4878       | 4868       | 4840       | 4885       | 4869       | 4799       | 4896       | 4846       | 4839       | 4961       | 4781       |
| <b>T24506G</b>              | 4897       | 4900       | 4969       | 4925       | 4970       | 4882       | 4847       | 4847       | 4976       | 4932       | 4868       | 4827       | 4869       | 4807       | 4830       | 4895       | 4975       | 4949       | 4982       | 4814       |
| <b>G24914C</b>              | 9428       | 9461       | 9370       | 9244       | 9519       | 9324       | 9458       | 9272       | 9403       | 9063       | 9525       | 9566       | 9460       | 9527       | 9536       | 9545       | 9387       | 9502       | 9459       | 9223       |
| <b>G26801C</b>              | 4824       | 4829       | 4834       | 4732       | 4805       | 4837       | 4903       | 4854       | 4902       | 4669       | 4803       | 4818       | 4830       | 4870       | 4821       | 4873       | 4870       | 4860       | 4843       | 4770       |
| <b>C27972T</b>              | 4900       | 4776       | 4851       | 4842       | 4833       | 4868       | 4780       | 4808       | 4877       | 4730       | 9325       | 9507       | 9097       | 9310       | 9304       | 9253       | 9292       | 9311       | 9505       | 7143       |
| <b>G28048T</b>              | 4879       | 4765       | 4862       | 4750       | 4810       | 4888       | 4759       | 4817       | 4888       | 4679       | 4920       | 4969       | 4791       | 4882       | 4868       | 4888       | 4898       | 4876       | 4880       | 3787       |
| <b>A28111G</b>              | 9626       | 9671       | 9729       | 9500       | 9655       | 9744       | 9677       | 9653       | 9720       | 9499       | 9719       | 9854       | 9661       | 9767       | 9687       | 9818       | 9852       | 9817       | 9705       | 8570       |
| <b>G28280C</b>              | 11561      | 10638      | 10424      | 10081      | 10946      | 10522      | 10627      | 10569      | 10227      | 10228      | 10076      | 10285      | 10275      | 9736       | 10389      | 10492      | 10464      | 10299      | 10080      | 10033      |
| <b>A28281T</b>              | 11563      | 10638      | 10424      | 10080      | 10946      | 10521      | 10626      | 10568      | 10225      | 10230      | 10077      | 10286      | 10276      | 9736       | 10389      | 10492      | 10464      | 10300      | 10079      | 10036      |
| <b>T28282A</b>              | 11572      | 10638      | 10423      | 10080      | 10947      | 10520      | 10625      | 10568      | 10223      | 10233      | 10078      | 10289      | 10276      | 9736       | 10390      | 10493      | 10464      | 10300      | 10080      | 10037      |
| <b>C28977T</b>              | 4864       | 4813       | 4845       | 4787       | 4925       | 4914       | 4833       | 4859       | 4835       | 4722       | 4824       | 4953       | 4853       | 4885       | 4782       | 4793       | 4922       | 4780       | 4897       | 4780       |

**Supplementary Table S2: Number of mutations that were considered at which theoretical and median coverage.** If N=7, it indicates that only the group of mutations with an initial coverage of approximately 10,000X was considered. If N=17, only the group of mutations with an initial coverage of approximately 5000X was considered. If N=24, it means that at that coverage all mutations could be considered.

| <b>Number of mutations</b> | <b>Theoretical coverage</b> | <b>Median coverage</b> |
|----------------------------|-----------------------------|------------------------|
| N=7                        | 10,000                      | 9792                   |
| N=7                        | 9000                        | 8790                   |
| N=7                        | 8000                        | 7801                   |
| N=7                        | 7000                        | 6834                   |
| N=7                        | 6000                        | 5855                   |
| N=24                       | 5000                        | 4855                   |
| N=17                       | 4500                        | 4362                   |
| N=24                       | 4000                        | 3876                   |
| N=17                       | 3500                        | 3386                   |
| N=24                       | 3000                        | 2907                   |
| N=17                       | 2500                        | 2416                   |
| N=24                       | 2000                        | 1939.5                 |
| N=24                       | 1500                        | 1456                   |
| N=24                       | 1000                        | 971                    |
| N=17                       | 750                         | 730                    |
| N=24                       | 500                         | 483                    |
| N=17                       | 250                         | 239                    |
| N=7                        | 200                         | 201                    |
| N=17                       | 100                         | 98                     |

**Supplementary Figure S1: Qualitative evaluation of Dataset 1 using the number of false negatives divided by the number of observations per condition until a targeted mutant AF of 100%.** Orange and red dots represent conditions with a FN proportion between 0 and 0.1, and between 0.1 and 1, respectively. The percentage of false negatives is coloured ranging from 0 (dark) to 1 (yellow) in intervals of 0.1 as extrapolated using a contour plot in the R package `plotly` [61] (actual FN proportions are presented in Supplementary Table S3). Note that a targeted AF of 0% corresponds to the wild-type and is therefore not presented. Both the x- and y-axis follow a logarithmic scale.

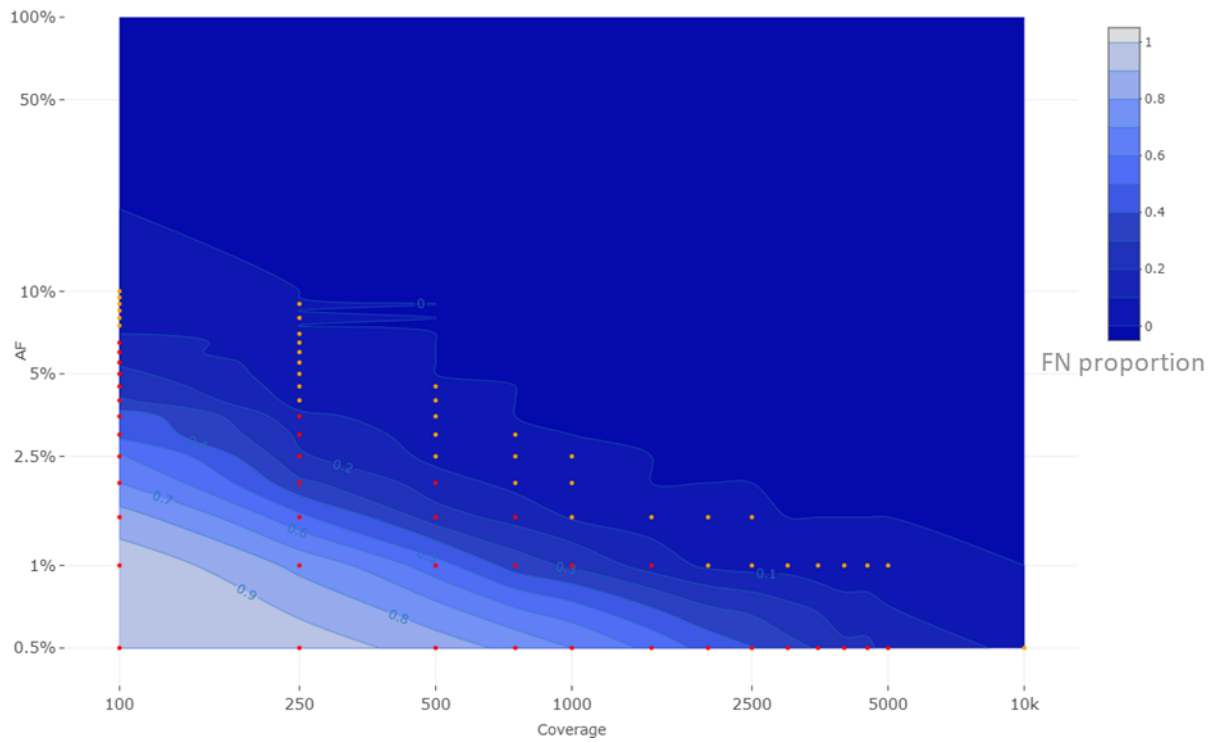

**Supplementary Table S3: Qualitative evaluation of Dataset 1 using the number of false negatives divided by the number of observations per condition until a targeted mutant AF of 100%.** The percentage of false negatives is coloured ranging from 0 (dark) to 1 (light) according to the gradient depicted in





**Supplementary Figure S2: Qualitative evaluation of Dataset 2 using the number of false negatives divided by the number of observations per condition until a targeted mutant AF of 100%.** Orange and red dots represent conditions with a FN proportion between 0 and 0.1, and between 0.1 and 1, respectively. The percentage of false negatives is coloured ranging from 0 (dark) to 1 (light) in intervals of 0.1 as extrapolated using a contour plot in the R package `plotly` [61] (actual FN proportions are presented in Supplementary Table S4). Note that a targeted AF of 0% represents to the wild-type and is therefore not presented. Both the x- and y-axis follow a logarithmic scale.

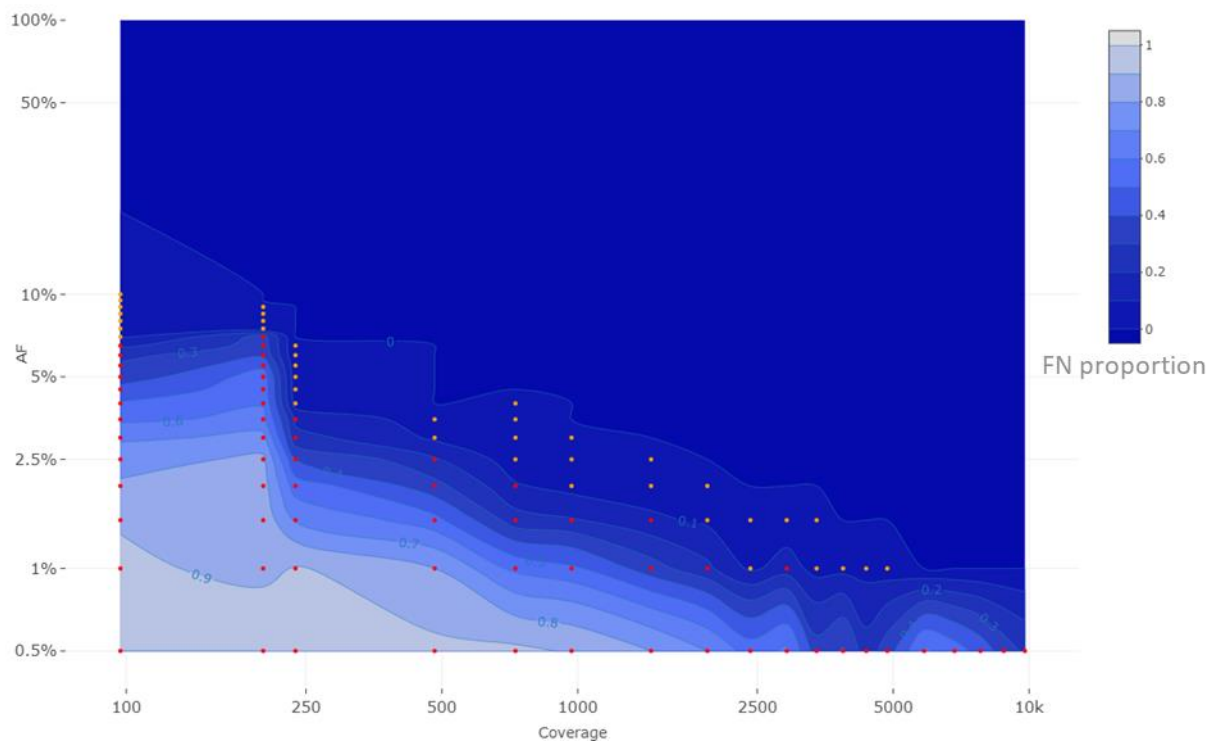



**Supplementary File S3: Variation of Dataset 1.** In the plots of A and B the SD on the y-axis is plotted against the AF (Reference value) on the x-axis (A: range 0-50%; B: range 0-10%) for each coverage (colours). Table C includes the actual values for the performance metric that was visualized in Figure 3A. In table D the interquartile ranges for each condition is indicated. In the tables, conditions with a false negative percentage greater than 75% were excluded. Note that a targeted AF of 0% and 100% corresponds to the wild-type and mutant respectively and is therefore not presented.

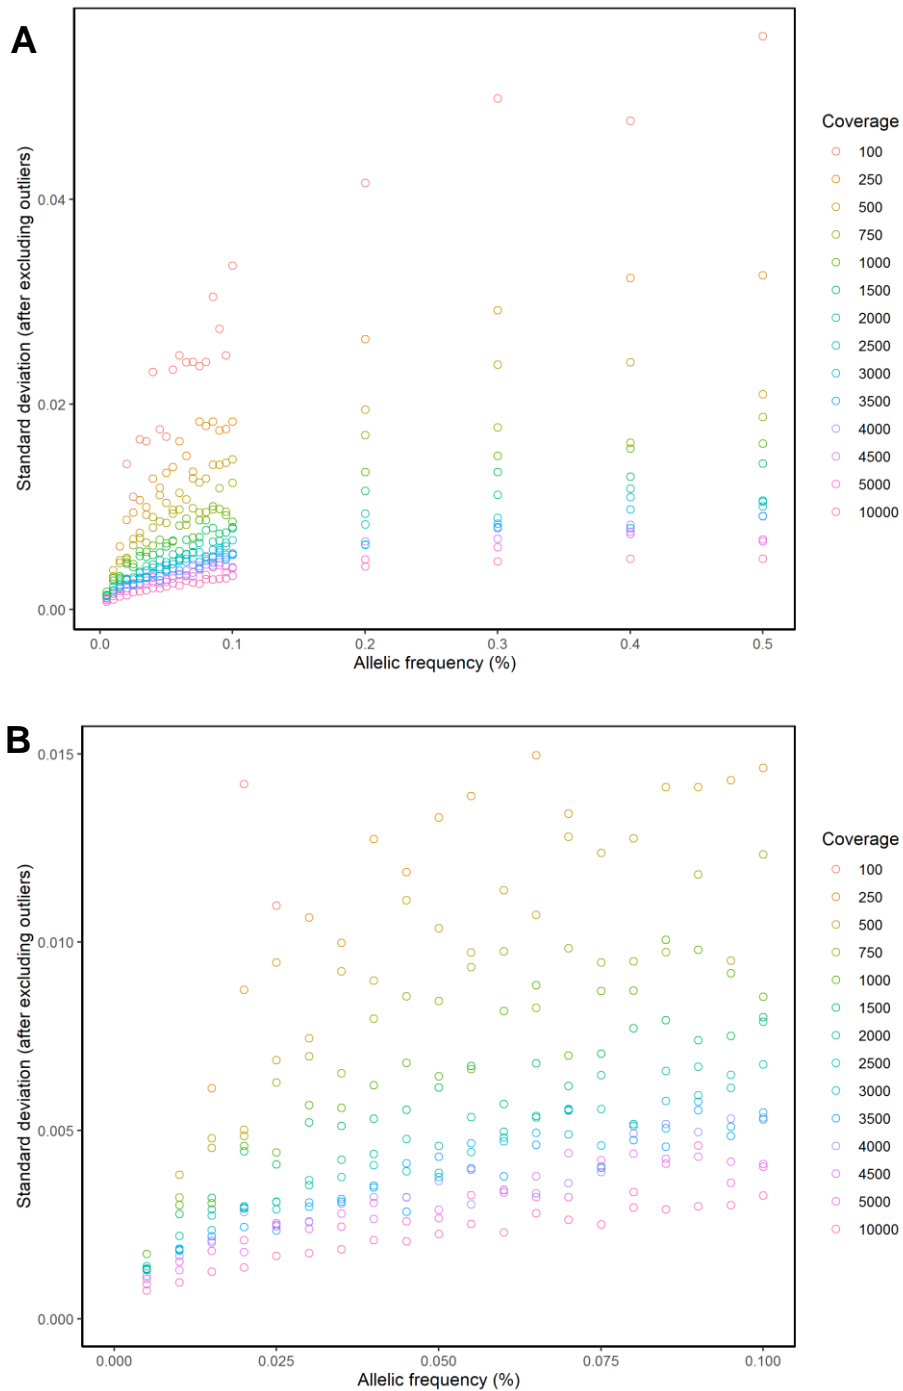

# C

| Coverage →<br>AF ↓ | 100  | 250  | 500  | 750  | 1000 | 1500 | 2000 | 2500 | 3000 | 3500 | 4000 | 4500 | 5000 | 10000 |
|--------------------|------|------|------|------|------|------|------|------|------|------|------|------|------|-------|
| 50.0%              | 1.00 | 0.34 | 0.14 | 0.11 | 0.08 | 0.06 | 0.04 | 0.04 | 0.03 | 0.03 | 0.03 | 0.01 | 0.01 | 0.01  |
| 40.0%              | 1.00 | 0.46 | 0.26 | 0.12 | 0.11 | 0.07 | 0.06 | 0.05 | 0.04 | 0.03 | 0.03 | 0.03 | 0.02 | 0.01  |
| 30.0%              | 1.00 | 0.34 | 0.23 | 0.13 | 0.09 | 0.07 | 0.05 | 0.03 | 0.03 | 0.03 | 0.03 | 0.02 | 0.01 | 0.01  |
| 20.0%              | 1.00 | 0.40 | 0.22 | 0.17 | 0.10 | 0.08 | 0.05 | 0.04 | 0.02 | 0.02 | 0.03 | 0.03 | 0.01 | 0.01  |
| 10.0%              | 1.00 | 0.30 | 0.19 | 0.14 | 0.06 | 0.06 | 0.06 | 0.04 | 0.03 | 0.02 | 0.03 | 0.01 | 0.01 | 0.01  |
| 9.5%               | 1.00 | 0.50 | 0.33 | 0.15 | 0.14 | 0.09 | 0.06 | 0.07 | 0.04 | 0.04 | 0.05 | 0.03 | 0.02 | 0.01  |
| 9.0%               | 1.00 | 0.41 | 0.27 | 0.19 | 0.13 | 0.07 | 0.06 | 0.05 | 0.04 | 0.04 | 0.03 | 0.02 | 0.03 | 0.01  |
| 8.5%               | 1.00 | 0.36 | 0.21 | 0.10 | 0.11 | 0.07 | 0.05 | 0.04 | 0.03 | 0.02 | 0.03 | 0.02 | 0.02 | 0.01  |
| 8.0%               | 1.00 | 0.55 | 0.28 | 0.15 | 0.13 | 0.10 | 0.05 | 0.05 | 0.05 | 0.04 | 0.04 | 0.03 | 0.02 | 0.02  |
| 7.5%               | 1.00 | 0.60 | 0.27 | 0.16 | 0.13 | 0.09 | 0.07 | 0.06 | 0.04 | 0.03 | 0.03 | 0.03 | 0.03 | 0.01  |
| 7.0%               | 1.00 | 0.31 | 0.28 | 0.17 | 0.08 | 0.07 | 0.05 | 0.05 | 0.04 | 0.05 | 0.02 | 0.03 | 0.02 | 0.01  |
| 6.5%               | 1.00 | 0.39 | 0.20 | 0.12 | 0.14 | 0.08 | 0.05 | 0.05 | 0.04 | 0.04 | 0.02 | 0.02 | 0.02 | 0.01  |
| 6.0%               | 1.00 | 0.44 | 0.21 | 0.16 | 0.11 | 0.05 | 0.04 | 0.04 | 0.04 | 0.02 | 0.02 | 0.02 | 0.02 | 0.01  |
| 5.5%               | 1.00 | 0.35 | 0.17 | 0.16 | 0.08 | 0.08 | 0.05 | 0.04 | 0.04 | 0.03 | 0.02 | 0.03 | 0.02 | 0.01  |
| 5.0%               | 1.00 | 0.63 | 0.38 | 0.25 | 0.15 | 0.13 | 0.07 | 0.05 | 0.05 | 0.07 | 0.05 | 0.03 | 0.03 | 0.02  |
| 4.5%               | 1.00 | 0.46 | 0.40 | 0.24 | 0.15 | 0.10 | 0.07 | 0.05 | 0.06 | 0.03 | 0.03 | 0.03 | 0.02 | 0.01  |
| 4.0%               | 1.00 | 0.30 | 0.15 | 0.12 | 0.07 | 0.05 | 0.04 | 0.03 | 0.02 | 0.02 | 0.02 | 0.01 | 0.02 | 0.01  |
| 3.5%               | 1.00 | 0.37 | 0.32 | 0.16 | 0.12 | 0.10 | 0.07 | 0.05 | 0.04 | 0.04 | 0.03 | 0.03 | 0.02 | 0.01  |
| 3.0%               | 1.00 | 0.41 | 0.20 | 0.18 | 0.12 | 0.10 | 0.05 | 0.05 | 0.03 | 0.03 | 0.02 | 0.02 | 0.02 | 0.01  |
| 2.5%               | 1.00 | 0.74 | 0.39 | 0.33 | 0.16 | 0.14 | 0.08 | 0.08 | 0.07 | 0.05 | 0.05 | 0.05 | 0.05 | 0.02  |
| 2.0%               | 1.00 | 0.38 | 0.13 | 0.12 | 0.10 | 0.10 | 0.04 | 0.04 | 0.04 | 0.03 | 0.04 | 0.02 | 0.02 | 0.01  |
| 1.5%               |      | 1.00 | 0.61 | 0.55 | 0.25 | 0.28 | 0.23 | 0.20 | 0.15 | 0.13 | 0.11 | 0.12 | 0.09 | 0.04  |
| 1.0%               |      |      | 1.00 | 0.71 | 0.63 | 0.53 | 0.33 | 0.23 | 0.24 | 0.23 | 0.19 | 0.11 | 0.16 | 0.06  |
| 0.5%               |      |      |      |      | 1.00 | 0.59 | 0.59 | 0.65 | 0.56 | 0.57 | 0.44 | 0.38 | 0.28 | 0.19  |

# D

| Coverage →<br>AF ↓ | 100   | 250   | 500   | 750   | 1000  | 1500  | 2000  | 2500  | 3000  | 3500  | 4000  | 4500  | 5000  | 10,000 |
|--------------------|-------|-------|-------|-------|-------|-------|-------|-------|-------|-------|-------|-------|-------|--------|
| 50.0%              | 6.26% | 4.10% | 2.44% | 2.06% | 1.93% | 1.79% | 1.28% | 1.39% | 1.28% | 0.97% | 0.91% | 0.88% | 0.70% | 0.62%  |
| 40.0%              | 5.86% | 3.45% | 2.37% | 1.94% | 1.98% | 1.55% | 1.33% | 1.18% | 1.17% | 0.87% | 1.00% | 0.91% | 0.79% | 0.55%  |
| 30.0%              | 6.06% | 3.40% | 2.83% | 2.02% | 1.89% | 1.36% | 1.39% | 1.21% | 1.07% | 0.97% | 0.84% | 0.88% | 0.86% | 0.55%  |
| 20.0%              | 4.59% | 2.74% | 2.26% | 1.99% | 1.47% | 1.34% | 1.05% | 0.90% | 0.89% | 0.95% | 0.73% | 0.74% | 0.67% | 0.52%  |
| 10.0%              | 3.49% | 2.47% | 1.65% | 1.33% | 0.98% | 0.85% | 0.83% | 0.86% | 0.70% | 0.59% | 0.60% | 0.50% | 0.55% | 0.36%  |
| 9.5%               | 3.03% | 2.23% | 1.81% | 1.44% | 1.00% | 0.71% | 0.80% | 0.67% | 0.74% | 0.67% | 0.56% | 0.48% | 0.42% | 0.37%  |
| 9.0%               | 3.16% | 2.11% | 1.65% | 1.27% | 1.14% | 0.91% | 0.78% | 0.73% | 0.67% | 0.62% | 0.56% | 0.55% | 0.47% | 0.34%  |
| 8.5%               | 3.50% | 2.09% | 1.63% | 1.25% | 0.90% | 0.92% | 0.69% | 0.65% | 0.61% | 0.54% | 0.62% | 0.48% | 0.45% | 0.31%  |
| 8.0%               | 2.95% | 1.81% | 1.53% | 1.24% | 1.03% | 0.87% | 0.68% | 0.56% | 0.52% | 0.47% | 0.52% | 0.54% | 0.48% | 0.32%  |
| 7.5%               | 3.12% | 2.02% | 1.55% | 1.14% | 0.96% | 0.84% | 0.74% | 0.67% | 0.60% | 0.50% | 0.59% | 0.52% | 0.51% | 0.31%  |
| 7.0%               | 3.15% | 2.26% | 1.49% | 1.16% | 0.92% | 0.80% | 0.71% | 0.53% | 0.61% | 0.62% | 0.50% | 0.48% | 0.51% | 0.29%  |
| 6.5%               | 2.38% | 1.64% | 1.42% | 1.25% | 0.90% | 0.78% | 0.59% | 0.62% | 0.53% | 0.53% | 0.41% | 0.47% | 0.40% | 0.33%  |
| 6.0%               | 2.87% | 1.87% | 1.34% | 1.17% | 0.90% | 0.73% | 0.71% | 0.55% | 0.50% | 0.51% | 0.40% | 0.44% | 0.41% | 0.26%  |
| 5.5%               | 2.47% | 1.60% | 1.06% | 1.12% | 0.84% | 0.69% | 0.59% | 0.46% | 0.48% | 0.47% | 0.48% | 0.44% | 0.39% | 0.28%  |
| 5.0%               | 2.07% | 1.55% | 1.32% | 0.97% | 0.67% | 0.70% | 0.52% | 0.55% | 0.47% | 0.51% | 0.44% | 0.39% | 0.30% | 0.27%  |
| 4.5%               | 2.41% | 1.58% | 1.15% | 0.90% | 0.87% | 0.64% | 0.58% | 0.48% | 0.46% | 0.38% | 0.37% | 0.35% | 0.30% | 0.25%  |
| 4.0%               | 2.41% | 1.42% | 1.18% | 0.92% | 0.68% | 0.58% | 0.53% | 0.47% | 0.48% | 0.42% | 0.36% | 0.38% | 0.34% | 0.25%  |
| 3.5%               | 1.81% | 1.24% | 1.04% | 0.75% | 0.73% | 0.59% | 0.55% | 0.41% | 0.38% | 0.37% | 0.40% | 0.29% | 0.32% | 0.23%  |
| 3.0%               | 2.02% | 1.28% | 0.83% | 0.86% | 0.76% | 0.67% | 0.49% | 0.42% | 0.38% | 0.38% | 0.29% | 0.30% | 0.31% | 0.20%  |
| 2.5%               | 2.08% | 1.37% | 0.78% | 0.74% | 0.59% | 0.47% | 0.37% | 0.37% | 0.29% | 0.34% | 0.33% | 0.28% | 0.30% | 0.21%  |
| 2.0%               | 2.08% | 1.13% | 0.70% | 0.56% | 0.52% | 0.41% | 0.33% | 0.37% | 0.33% | 0.29% | 0.31% | 0.27% | 0.22% | 0.20%  |
| 1.5%               | 1.65% | 0.86% | 0.57% | 0.48% | 0.37% | 0.33% | 0.36% | 0.28% | 0.28% | 0.26% | 0.25% | 0.22% | 0.22% | 0.14%  |
| 1.0%               | 1.82% | 0.92% | 0.54% | 0.39% | 0.30% | 0.25% | 0.31% | 0.22% | 0.21% | 0.22% | 0.20% | 0.17% | 0.18% | 0.11%  |
| 0.5%               | 1.16% | 0.99% | 0.60% | 0.41% | 0.33% | 0.24% | 0.17% | 0.16% | 0.14% | 0.13% | 0.14% | 0.12% | 0.10% | 0.08%  |

**Supplementary File S4: Variation of Dataset 2.** In the plots of A and B the SD on the y-axis is plotted against the AF on the x-axis (A: range 0-50%; B: range 0-10%) for each coverage (colours). Table C includes the actual values for the performance metric that was visualized in Figure 3B. In table D the interquartile ranges for each condition is indicated, while excluding false negative results. In the tables, conditions with a false negative percentage greater than 75% were excluded. Note that a targeted AF of 0% and 100% corresponds to the wild-type and mutant respectively and is therefore not presented.

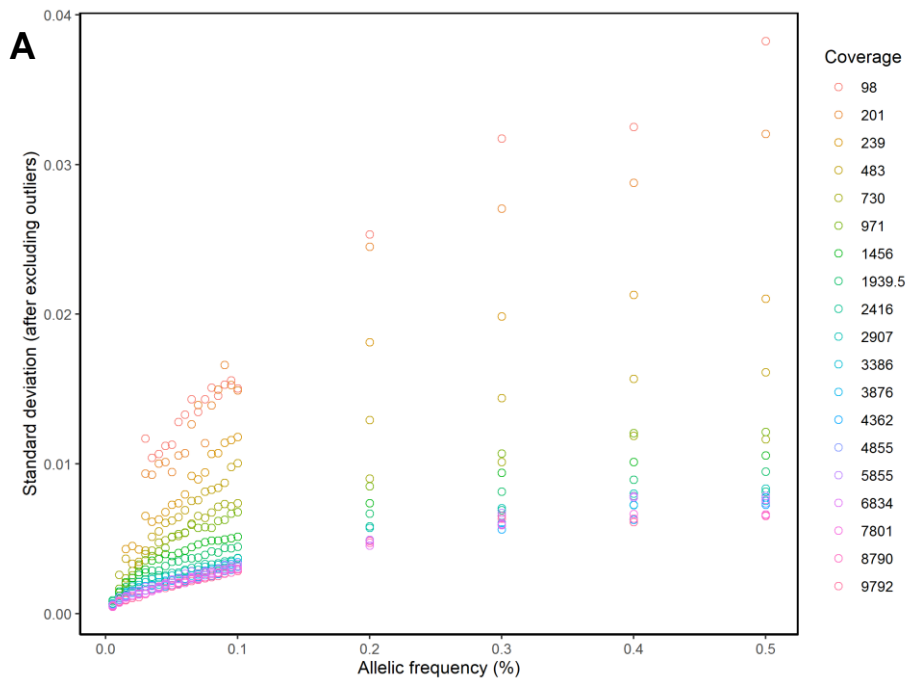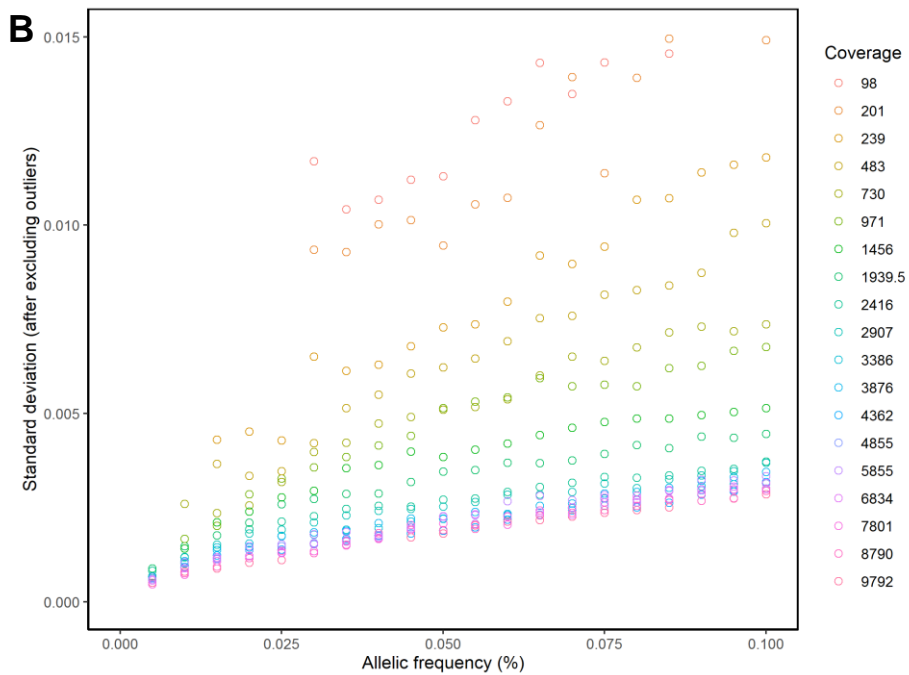

**C**

| Coverage →<br>AF ↓ | 97   | 201  | 237  | 482  | 728  | 969  | 1454 | 1937 | 2413 | 2904 | 3383 | 3872 | 4358 | 4851 | 5855 | 6834 | 7801 | 8790 | 9792 |
|--------------------|------|------|------|------|------|------|------|------|------|------|------|------|------|------|------|------|------|------|------|
| 50.0%              | 1.00 | 0.70 | 0.30 | 0.18 | 0.09 | 0.10 | 0.08 | 0.06 | 0.05 | 0.05 | 0.04 | 0.04 | 0.04 | 0.04 | 0.04 | 0.04 | 0.03 | 0.03 | 0.03 |
| 40.0%              | 1.00 | 0.78 | 0.43 | 0.23 | 0.13 | 0.14 | 0.10 | 0.08 | 0.06 | 0.06 | 0.05 | 0.05 | 0.04 | 0.04 | 0.06 | 0.06 | 0.04 | 0.04 | 0.04 |
| 30.0%              | 1.00 | 0.73 | 0.39 | 0.21 | 0.10 | 0.11 | 0.09 | 0.07 | 0.05 | 0.05 | 0.04 | 0.04 | 0.03 | 0.03 | 0.05 | 0.04 | 0.03 | 0.04 | 0.04 |
| 20.0%              | 1.00 | 0.93 | 0.51 | 0.26 | 0.13 | 0.11 | 0.08 | 0.07 | 0.05 | 0.05 | 0.03 | 0.04 | 0.03 | 0.03 | 0.04 | 0.03 | 0.04 | 0.03 | 0.04 |
| 10.0%              | 1.00 | 0.98 | 0.62 | 0.45 | 0.24 | 0.20 | 0.12 | 0.09 | 0.06 | 0.06 | 0.04 | 0.05 | 0.04 | 0.04 | 0.05 | 0.04 | 0.04 | 0.04 | 0.04 |
| 9.5%               | 1.00 | 0.96 | 0.56 | 0.40 | 0.21 | 0.18 | 0.10 | 0.08 | 0.05 | 0.05 | 0.04 | 0.05 | 0.04 | 0.04 | 0.04 | 0.04 | 0.04 | 0.03 | 0.03 |
| 9.0%               | 0.85 | 1.00 | 0.47 | 0.28 | 0.19 | 0.14 | 0.09 | 0.07 | 0.04 | 0.04 | 0.03 | 0.04 | 0.03 | 0.03 | 0.04 | 0.03 | 0.03 | 0.03 | 0.03 |
| 8.5%               | 0.95 | 1.00 | 0.51 | 0.32 | 0.23 | 0.17 | 0.11 | 0.07 | 0.05 | 0.05 | 0.04 | 0.04 | 0.03 | 0.03 | 0.04 | 0.04 | 0.03 | 0.03 | 0.03 |
| 8.0%               | 1.00 | 0.85 | 0.50 | 0.30 | 0.20 | 0.14 | 0.10 | 0.08 | 0.05 | 0.04 | 0.03 | 0.04 | 0.03 | 0.03 | 0.03 | 0.03 | 0.03 | 0.03 | 0.03 |
| 7.5%               | 1.00 | 0.63 | 0.43 | 0.32 | 0.20 | 0.16 | 0.11 | 0.08 | 0.05 | 0.05 | 0.04 | 0.04 | 0.03 | 0.03 | 0.04 | 0.04 | 0.03 | 0.03 | 0.03 |
| 7.0%               | 0.94 | 1.00 | 0.41 | 0.30 | 0.22 | 0.17 | 0.11 | 0.07 | 0.05 | 0.04 | 0.03 | 0.04 | 0.03 | 0.03 | 0.04 | 0.03 | 0.03 | 0.03 | 0.03 |
| 6.5%               | 1.00 | 0.78 | 0.41 | 0.28 | 0.18 | 0.17 | 0.10 | 0.07 | 0.05 | 0.04 | 0.03 | 0.03 | 0.03 | 0.03 | 0.04 | 0.03 | 0.03 | 0.03 | 0.02 |
| 6.0%               | 1.00 | 0.65 | 0.36 | 0.27 | 0.16 | 0.17 | 0.10 | 0.08 | 0.05 | 0.05 | 0.03 | 0.03 | 0.03 | 0.03 | 0.04 | 0.03 | 0.02 | 0.03 | 0.03 |
| 5.5%               | 1.00 | 0.68 | 0.33 | 0.25 | 0.16 | 0.17 | 0.10 | 0.07 | 0.05 | 0.04 | 0.03 | 0.03 | 0.02 | 0.03 | 0.03 | 0.03 | 0.03 | 0.02 | 0.03 |
| 5.0%               | 1.00 | 0.70 | 0.42 | 0.30 | 0.20 | 0.21 | 0.12 | 0.09 | 0.06 | 0.05 | 0.04 | 0.04 | 0.03 | 0.03 | 0.04 | 0.04 | 0.03 | 0.03 | 0.03 |
| 4.5%               | 1.00 | 0.82 | 0.37 | 0.29 | 0.19 | 0.15 | 0.13 | 0.08 | 0.05 | 0.05 | 0.04 | 0.04 | 0.03 | 0.03 | 0.03 | 0.03 | 0.03 | 0.03 | 0.02 |
| 4.0%               | 1.00 | 0.88 | 0.35 | 0.27 | 0.20 | 0.15 | 0.12 | 0.07 | 0.06 | 0.05 | 0.03 | 0.04 | 0.03 | 0.03 | 0.03 | 0.03 | 0.02 | 0.03 | 0.02 |
| 3.5%               | 1.00 | 0.80 | 0.35 | 0.24 | 0.16 | 0.14 | 0.12 | 0.08 | 0.06 | 0.05 | 0.03 | 0.03 | 0.03 | 0.02 | 0.03 | 0.02 | 0.02 | 0.02 | 0.02 |
| 3.0%               | 1.00 | 0.64 | 0.31 | 0.13 | 0.12 | 0.09 | 0.06 | 0.05 | 0.04 | 0.03 | 0.02 | 0.02 | 0.02 | 0.02 | 0.02 | 0.02 | 0.01 | 0.01 | 0.01 |
| 2.5%               |      |      | 1.00 | 0.65 | 0.55 | 0.58 | 0.42 | 0.36 | 0.25 | 0.20 | 0.17 | 0.16 | 0.11 | 0.12 | 0.13 | 0.09 | 0.09 | 0.10 | 0.07 |
| 2.0%               |      |      | 1.00 | 0.55 | 0.32 | 0.40 | 0.28 | 0.22 | 0.18 | 0.16 | 0.12 | 0.10 | 0.09 | 0.09 | 0.11 | 0.07 | 0.07 | 0.07 | 0.05 |
| 1.5%               |      |      | 1.00 | 0.73 | 0.30 | 0.22 | 0.24 | 0.17 | 0.12 | 0.13 | 0.11 | 0.10 | 0.08 | 0.07 | 0.07 | 0.08 | 0.06 | 0.05 | 0.04 |
| 1.0%               |      |      |      |      | 1.00 | 0.41 | 0.30 | 0.32 | 0.21 | 0.21 | 0.15 | 0.17 | 0.13 | 0.16 | 0.16 | 0.12 | 0.08 | 0.09 | 0.10 |
| 0.5%               |      |      |      |      |      |      |      | 1.00 | 0.88 | 0.60 | 0.59 | 0.58 | 0.52 | 0.53 | 0.46 | 0.41 | 0.28 | 0.42 | 0.33 |

**D**

| Coverage →<br>AF ↓ | 97    | 201   | 237   | 482   | 728   | 969   | 1454  | 1937  | 2413  | 2904  | 3383  | 3872  | 4358  | 4851  | 5855  | 6834  | 7801  | 8790  | 9792  |
|--------------------|-------|-------|-------|-------|-------|-------|-------|-------|-------|-------|-------|-------|-------|-------|-------|-------|-------|-------|-------|
| 50.0%              | 3.90% | 4.30% | 2.75% | 1.94% | 1.56% | 1.53% | 1.25% | 1.07% | 0.90% | 0.89% | 0.78% | 0.84% | 0.73% | 0.77% | 0.97% | 0.86% | 0.92% | 0.96% | 0.97% |
| 40.0%              | 5.08% | 5.67% | 3.56% | 2.27% | 1.83% | 1.78% | 1.61% | 1.16% | 0.99% | 0.99% | 0.87% | 0.89% | 0.79% | 0.82% | 1.11% | 1.33% | 1.14% | 0.93% | 0.87% |
| 30.0%              | 5.65% | 6.02% | 3.97% | 2.35% | 1.75% | 1.82% | 1.70% | 1.36% | 1.05% | 1.04% | 0.85% | 0.91% | 0.76% | 0.82% | 1.14% | 0.95% | 0.95% | 1.18% | 1.09% |
| 20.0%              | 4.86% | 6.93% | 4.02% | 2.73% | 1.76% | 1.52% | 1.44% | 1.30% | 1.17% | 1.08% | 0.84% | 0.78% | 0.70% | 0.72% | 0.75% | 0.70% | 0.80% | 0.77% | 0.77% |
| 10.0%              | 3.93% | 5.28% | 3.25% | 2.44% | 1.80% | 1.65% | 1.02% | 0.83% | 0.83% | 0.81% | 0.77% | 0.77% | 0.74% | 0.65% | 0.54% | 0.49% | 0.43% | 0.42% | 0.41% |
| 9.5%               | 3.78% | 5.68% | 3.09% | 2.44% | 1.82% | 1.67% | 0.97% | 0.79% | 0.78% | 0.78% | 0.67% | 0.74% | 0.72% | 0.66% | 0.50% | 0.50% | 0.43% | 0.40% | 0.41% |
| 9.0%               | 3.78% | 5.65% | 2.81% | 2.18% | 1.74% | 1.63% | 0.98% | 0.77% | 0.72% | 0.82% | 0.68% | 0.68% | 0.73% | 0.66% | 0.49% | 0.47% | 0.43% | 0.42% | 0.36% |
| 8.5%               | 3.50% | 5.39% | 2.55% | 2.41% | 1.68% | 1.64% | 0.96% | 0.78% | 0.67% | 0.78% | 0.66% | 0.65% | 0.59% | 0.64% | 0.49% | 0.48% | 0.43% | 0.44% | 0.38% |
| 8.0%               | 3.31% | 5.34% | 2.53% | 2.23% | 1.68% | 1.67% | 1.00% | 0.80% | 0.62% | 0.68% | 0.63% | 0.61% | 0.58% | 0.62% | 0.37% | 0.44% | 0.44% | 0.40% | 0.36% |
| 7.5%               | 3.14% | 4.05% | 2.33% | 1.98% | 1.67% | 1.57% | 1.02% | 0.80% | 0.62% | 0.71% | 0.67% | 0.62% | 0.55% | 0.54% | 0.46% | 0.43% | 0.41% | 0.41% | 0.36% |
| 7.0%               | 3.05% | 4.32% | 2.36% | 2.44% | 1.80% | 1.41% | 1.11% | 0.75% | 0.62% | 0.61% | 0.57% | 0.55% | 0.52% | 0.56% | 0.49% | 0.36% | 0.38% | 0.38% | 0.34% |
| 6.5%               | 2.93% | 4.17% | 2.26% | 2.73% | 1.70% | 1.42% | 1.08% | 0.75% | 0.66% | 0.57% | 0.53% | 0.58% | 0.53% | 0.50% | 0.55% | 0.36% | 0.38% | 0.38% | 0.38% |
| 6.0%               | 2.81% | 4.30% | 2.14% | 2.50% | 1.61% | 1.32% | 1.10% | 0.77% | 0.62% | 0.53% | 0.46% | 0.51% | 0.54% | 0.49% | 0.53% | 0.42% | 0.27% | 0.35% | 0.34% |
| 5.5%               | 2.49% | 2.94% | 2.15% | 2.24% | 1.51% | 1.62% | 1.13% | 0.81% | 0.60% | 0.57% | 0.44% | 0.51% | 0.48% | 0.44% | 0.49% | 0.46% | 0.36% | 0.32% | 0.32% |
| 5.0%               | 2.27% | 1.95% | 2.28% | 2.02% | 1.25% | 1.44% | 1.08% | 0.89% | 0.58% | 0.54% | 0.45% | 0.43% | 0.42% | 0.45% | 0.44% | 0.46% | 0.38% | 0.34% | 0.29% |
| 4.5%               | 2.15% | 1.70% | 2.31% | 1.75% | 1.52% | 1.22% | 0.99% | 0.87% | 0.66% | 0.52% | 0.45% | 0.40% | 0.36% | 0.43% | 0.37% | 0.40% | 0.40% | 0.34% | 0.31% |
| 4.0%               | 1.85% | 1.55% | 1.95% | 1.51% | 1.28% | 1.25% | 0.89% | 0.88% | 0.69% | 0.53% | 0.42% | 0.43% | 0.33% | 0.35% | 0.36% | 0.33% | 0.34% | 0.36% | 0.32% |
| 3.5%               | 1.34% | 1.68% | 1.72% | 1.33% | 1.13% | 1.33% | 1.09% | 0.75% | 0.64% | 0.62% | 0.43% | 0.39% | 0.36% | 0.34% | 0.38% | 0.31% | 0.29% | 0.33% | 0.34% |
| 3.0%               | 1.48% | 1.18% | 1.51% | 1.15% | 0.99% | 1.26% | 0.80% | 0.67% | 0.61% | 0.58% | 0.47% | 0.41% | 0.34% | 0.34% | 0.32% | 0.32% | 0.27% | 0.27% | 0.29% |
| 2.5%               |       |       | 0.87% | 1.09% | 0.82% | 1.04% | 0.75% | 0.72% | 0.55% | 0.54% | 0.45% | 0.44% | 0.37% | 0.31% | 0.28% | 0.24% | 0.26% | 0.28% | 0.23% |
| 2.0%               |       |       | 0.96% | 0.99% | 0.71% | 0.74% | 0.81% | 0.65% | 0.54% | 0.45% | 0.43% | 0.44% | 0.35% | 0.36% | 0.28% | 0.22% | 0.24% | 0.23% | 0.22% |
| 1.5%               |       |       | 0.50% | 0.94% | 0.71% | 0.57% | 0.59% | 0.56% | 0.38% | 0.39% | 0.40% | 0.35% | 0.32% | 0.33% | 0.29% | 0.30% | 0.23% | 0.18% | 0.19% |
| 1.0%               |       |       |       |       | 0.55% | 0.48% | 0.37% | 0.36% | 0.34% | 0.37% | 0.31% | 0.30% | 0.25% | 0.28% | 0.18% | 0.21% | 0.24% | 0.19% | 0.22% |
| 0.5%               |       |       |       |       |       |       |       | 0.20% | 0.18% | 0.22% | 0.16% | 0.18% | 0.16% | 0.18% | 0.23% | 0.23% | 0.20% | 0.10% | 0.14% |
